# Supplementary material
Source: PubMed Central journal article supplement (PMC8017547)

# Supplemental Figure 1

**A**

**4°C**

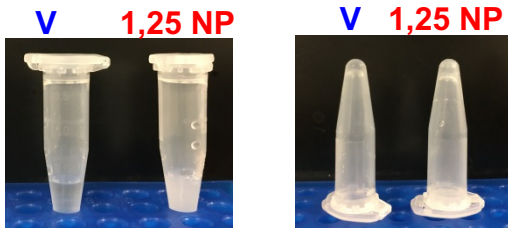

**B**

**37°C**

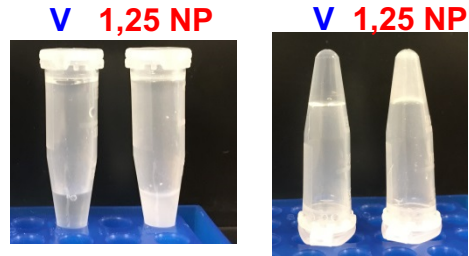

## Supplemental Figure 2

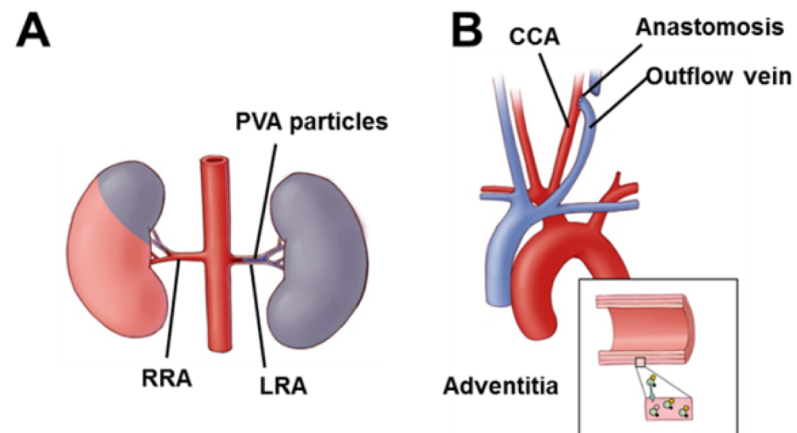

**C**

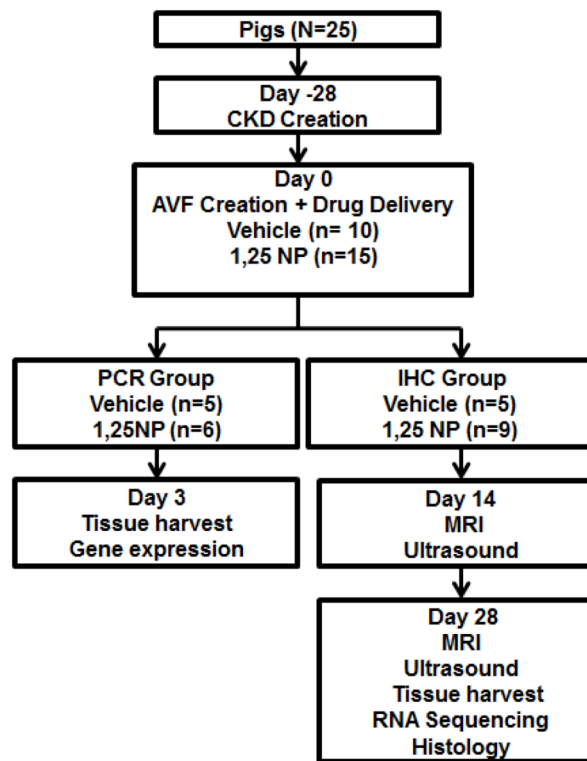

# Supplemental Figure 3

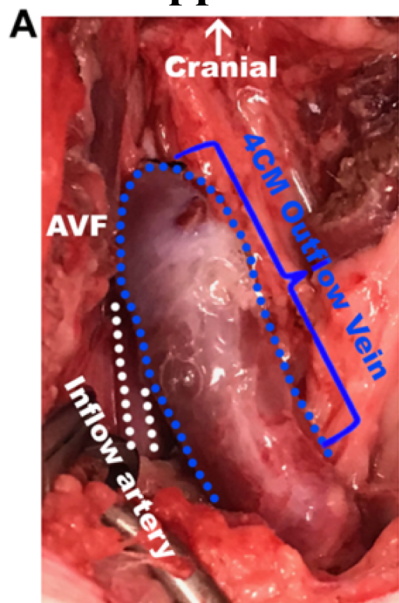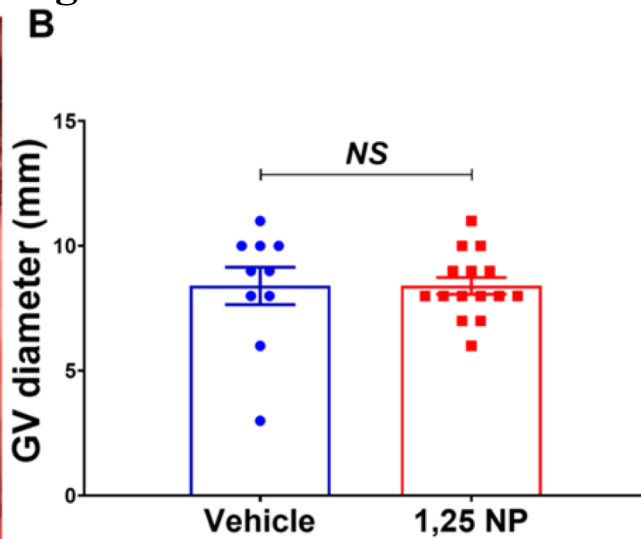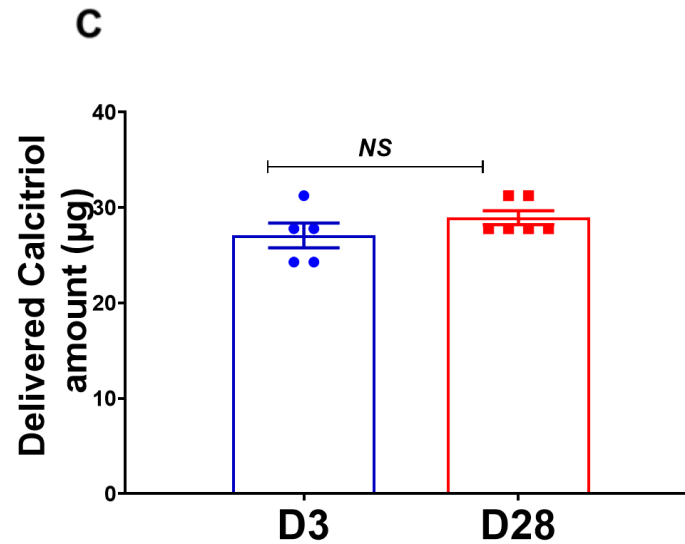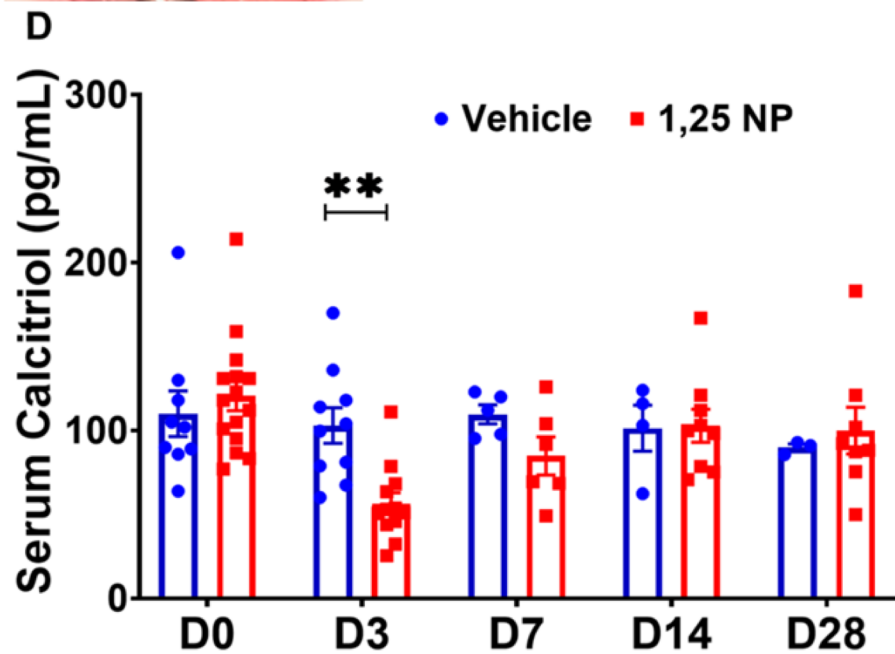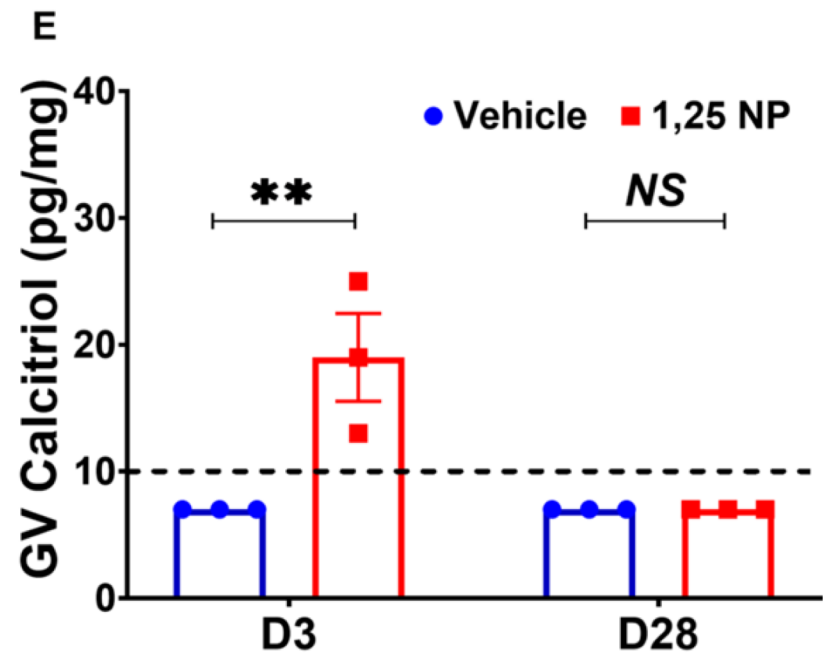

# Supplemental Figure 4

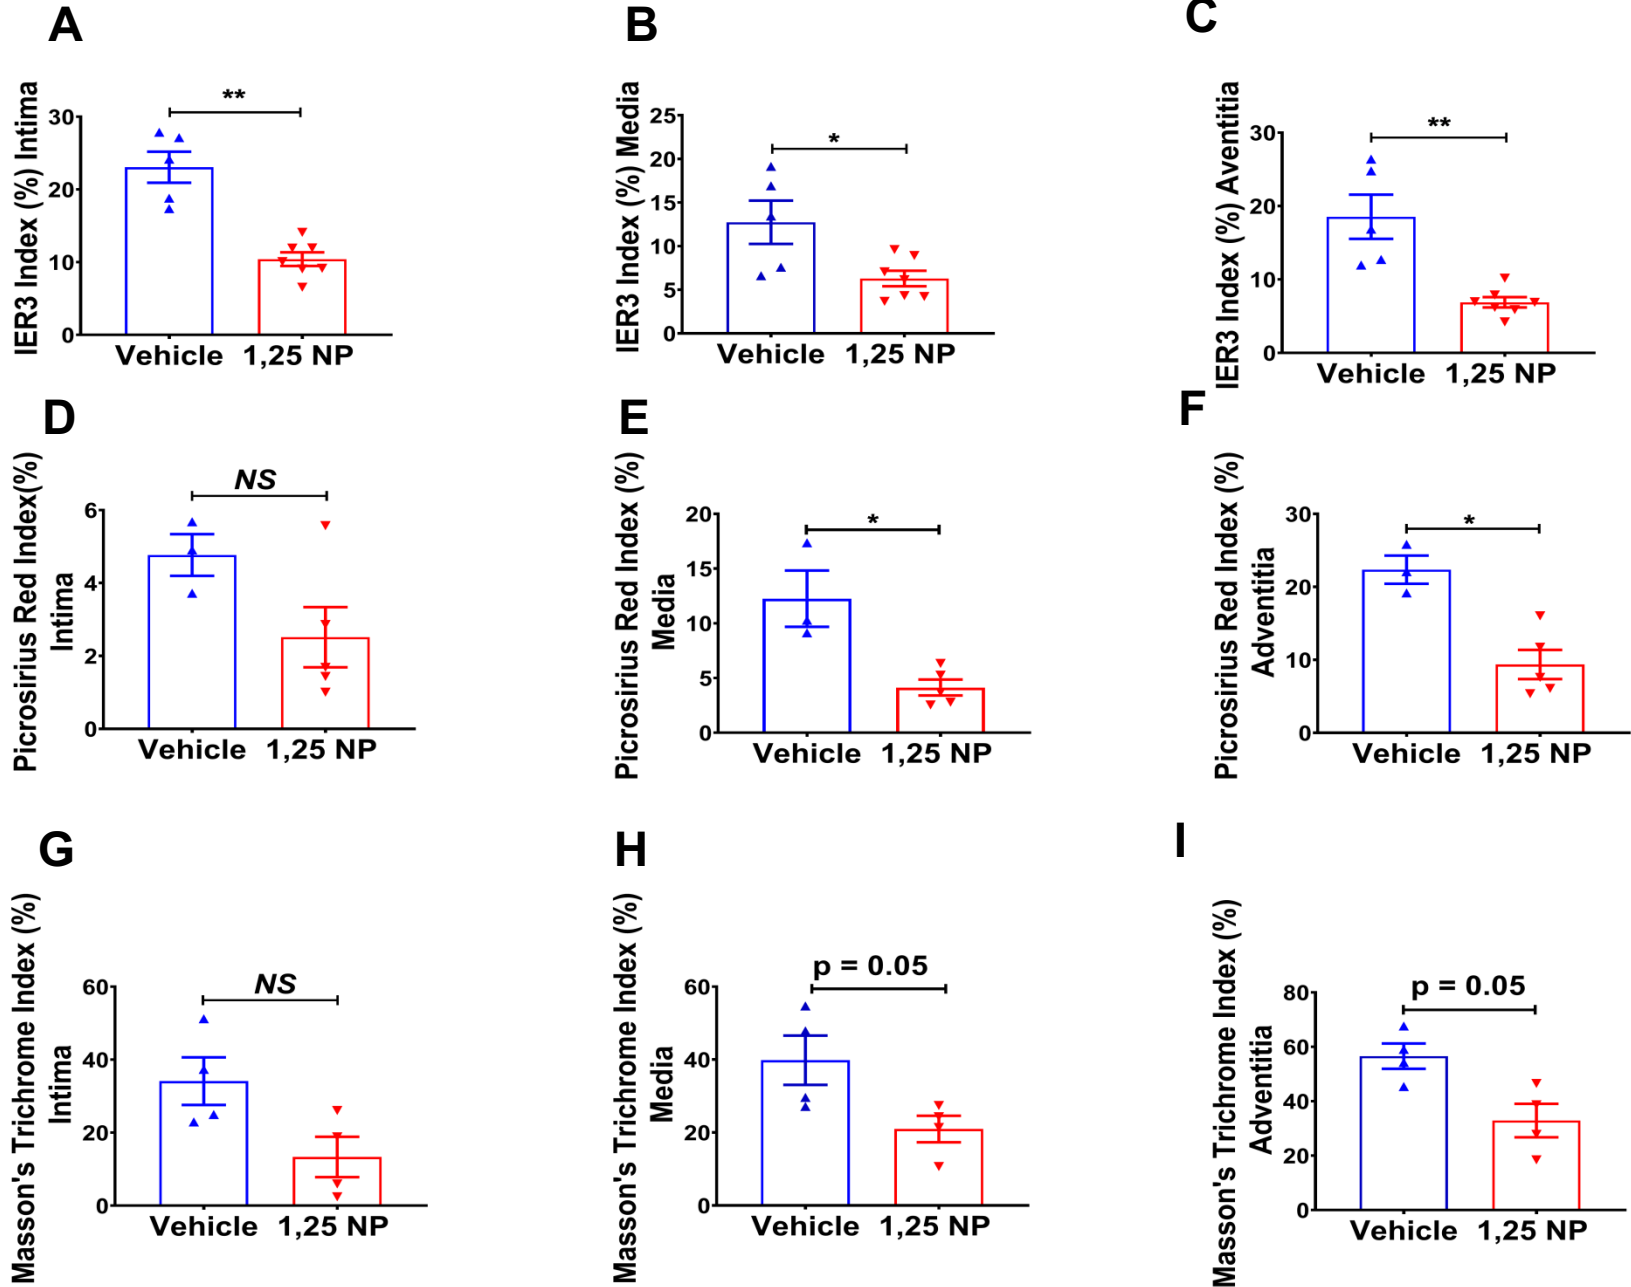



# Supplemental Figure 5

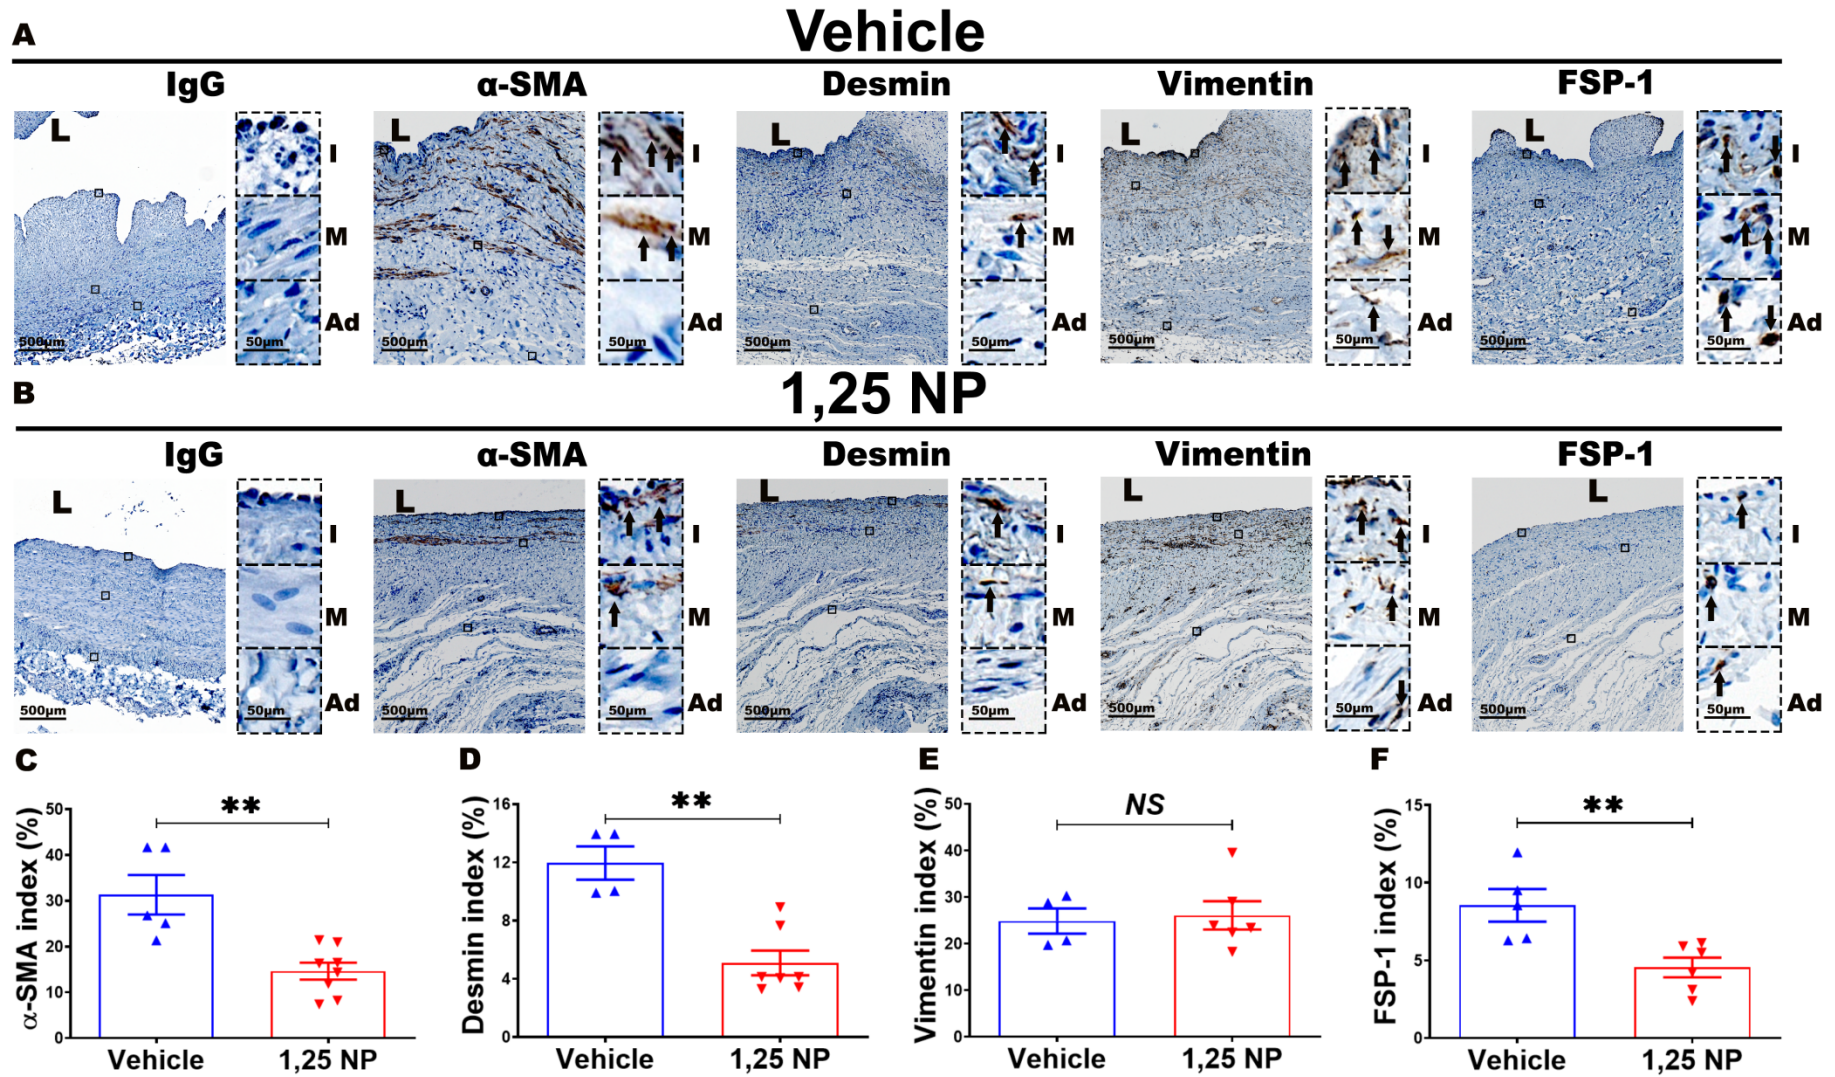

# Supplemental Figure 6

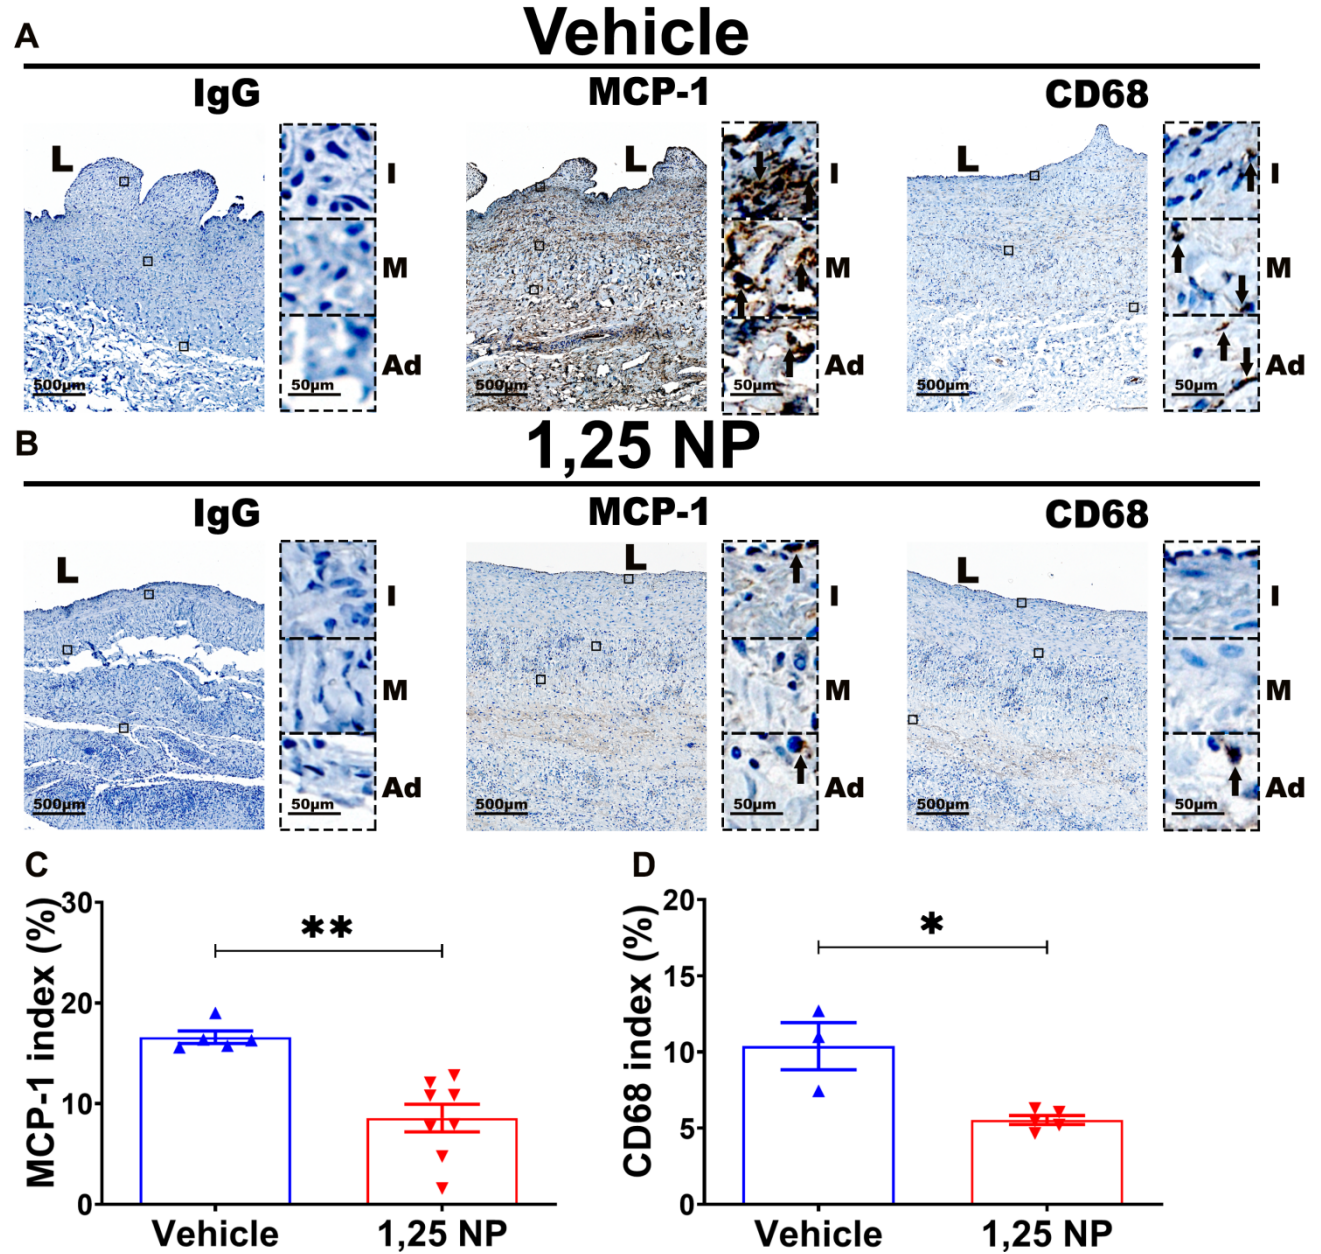



Supplemental Figure 7

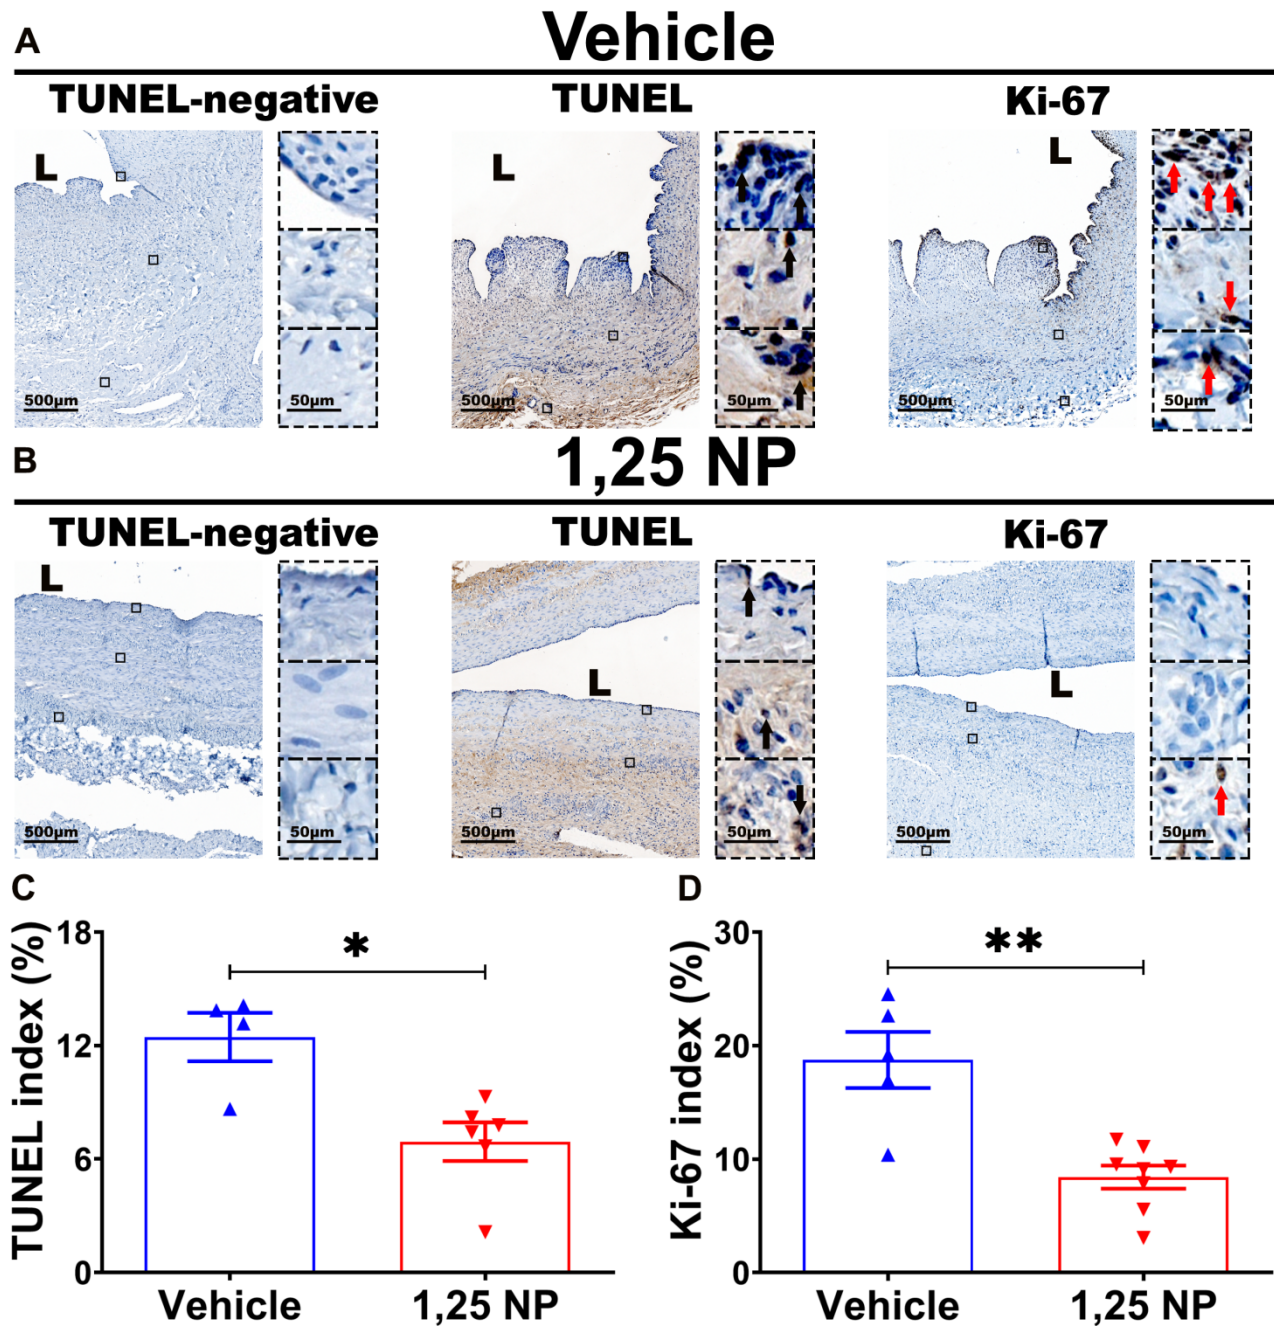

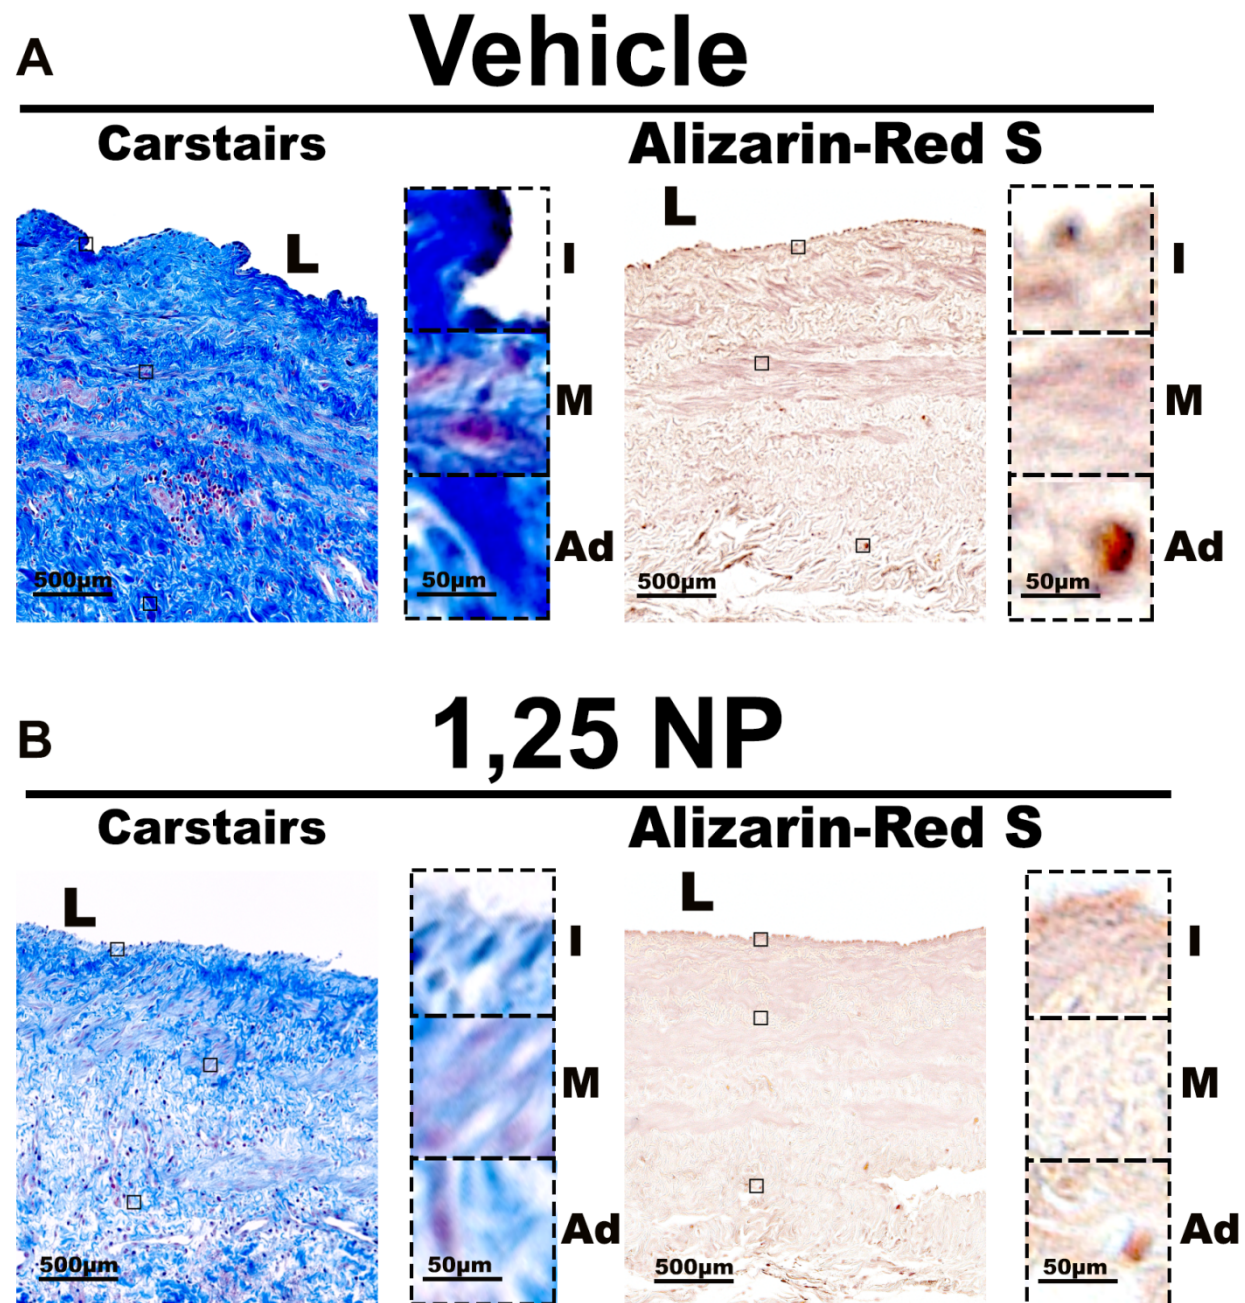

# Supplemental Figure 9

**A.**

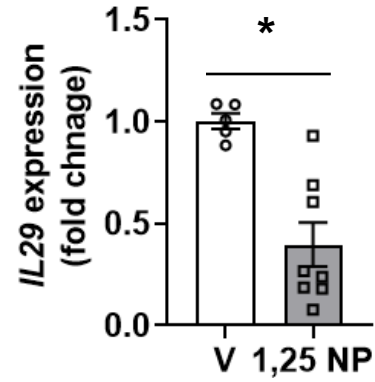

**B.**

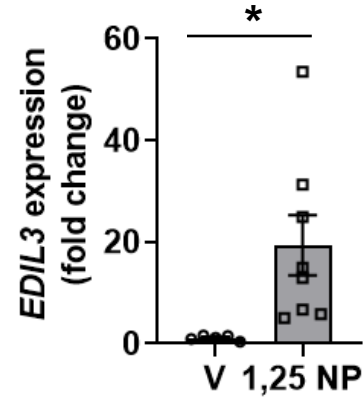

Supplement: ASN.2020060832SupplementaryData2.pdf [file ASN.2020060832SupplementaryData2.pdf]
