# Supplementary material
Source: PubMed Central journal article supplement (PMC8017547)
Supplement: ASN.2020060832SupplementaryData1.pdf [file ASN.2020060832SupplementaryData1.pdf]

**Supplemental Material: Table of Contents**

| <b>SL No</b> | <b>Description</b>                                                                                                                                          |
|--------------|-------------------------------------------------------------------------------------------------------------------------------------------------------------|
| 1            | Supplemental Figure 1: In vitro characterization of hydrogel                                                                                                |
| 2            | Supplemental Figure 2: Schematic Representation of Pig AVF Model and Study Design                                                                           |
| 3            | Supplemental Figure 3: Drug delivery and Measurement of 1,25(OH) <sub>2</sub> D <sub>3</sub> Concentration in Serum and Outflow vein after Delivery of Drug |
| 4            | Supplemental Figure 4: Immunohistochemical staining of IER3, Masson's trichrome, and picosirus red staining                                                 |
| 5            | Supplemental Figure 5: Immunohistochemical Staining for $\alpha$ -SMA, Desmin, Vimentin and FSP-1                                                           |
| 6            | Supplemental Figure 6: Immunohistochemical Staining for MCP-1 and CD68                                                                                      |
| 7            | Supplemental Figure 7: Assessment of Cell Apoptosis and Proliferation in the AVF outflow vein                                                               |
| 8            | Supplemental Figure 8: Carstairs and Alizarin-Red S Staining                                                                                                |
| 9            | Supplemental Figure 9: qRT-PCR analysis of IL29 and EDIL3                                                                                                   |
| 10           | Supplemental Table 1: Amount of Drug Delivery                                                                                                               |
| 11           | Supplemental Table 2: List of primers used for gene expression analysis                                                                                     |
| 12           | Supplemental Table 3: List of antibodies used for IHC in the present study                                                                                  |
| 13           | Supplemental Table 4: Serum Blood Urea Nitrogen (BUN) analysis of animals                                                                                   |
| 14           | Supplemental Table 5: Serum Creatinine analysis of animals                                                                                                  |
| 15           | Supplemental Table 6: Serum Calcium analysis of animals                                                                                                     |
| 16           | Supplemental Table 7: Serum Phosphate analysis of animals                                                                                                   |
| 17           | Supplemental Table 8: Serum Potassium analysis of animals                                                                                                   |
| 18           | Supplemental Table 9: Serum Glucose analysis of animals                                                                                                     |
| 19           | Supplemental Table 10: Serum Albumin analysis of animals                                                                                                    |
| 20           | Supplemental Table 11: Serum Total Carbon Dioxide analysis of animals                                                                                       |
| 21           | Supplemental Table 12: Serum Sodium analysis of animals                                                                                                     |
| 22           | Supplemental Table 13: Serum Chloride analysis of animals                                                                                                   |
| 23           | Supplemental Table 14: Weight of animals                                                                                                                    |
| 24           | Supplemental Table 15: Systolic Blood Pressure of animals                                                                                                   |
| 25           | Supplemental Table 16: Diastolic Blood Pressure of animals                                                                                                  |
| 26           | Supplemental Table 17: List of up-regulated genes                                                                                                           |
| 27           | Supplemental Table 18: List of down-regulated genes                                                                                                         |

**Supplemental Figure 1: In vitro Characterization of Hydrogel**

(A) At 4°C, hydrogel with  $1\alpha,25(\text{OH})_2\text{D}_3$  (vehicle) or hydrogel+ PLGA nanoparticles (1,25 NP) are in suspension form change position with gravity and (B) After incubation at 37°C for 15 min, both (vehicle and 1,2NP) are in gel form and fail to change position with gravity.

**Supplemental Figure 2: Schematic Representation of Pig AVF Model and Study Design**

(A) Schematic representation of Chronic Kidney Disease (CKD) creation in Pig. Renal artery embolization was used to induce CKD. (B) Schematic representation of arteriovenous fistula (AVF) creation in pig after 28 days of renal artery embolization. An end-to-side JV to CCA anastomosis was created. 1,25NP with hydrogel was delivered to adventitia layer immediately after creation. (C) The scheme of study design. One group of animals was sacrificed 3 days after AVF creation (PCR group). The other group of animals was sacrificed 28 days after AVF creation (IHC group). Both group of animals either received hydrogel with PLGA without  $1\alpha,25(\text{OH})_2\text{D}_3$  (Vehicle) or hydrogel with PLGA and  $1\alpha,25(\text{OH})_2\text{D}_3$  (1,25NP). RRA, right renal artery; LRA, left renal artery; CCA, common carotid artery; GV, outflow vein; LEJV, Left external jugular vein; LCCA, left common carotid artery; CV, contralateral vein; MRI, magnetic resonance imaging; US, ultrasound.

**Supplemental Figure 3: Drug Delivery and Measurement of  $1\alpha,25(\text{OH})_2\text{D}_3$  Concentration in Serum and Outflow vein after Delivery of Drug**

(A) Representative intraoperative image of 1,25 NP or vehicle layering to the adventitia layer of outflow vein for the 4 cm length from the anastomosis immediately after AVF creation. (B) Outflow vein diameter was used to calculate the surface area before delivering the 1,25 NP or vehicle. There was no significant difference in the outflow vein diameter between 1,25 NP and vehicle group. (C) There was no significant difference in the amount of calcitriol delivered between day 3 and day 28 group. (D) Serum  $1\alpha,25(\text{OH})_2\text{D}_3$  level of animals were measured by mass spectrometry on day of AVF creation and at day 3, day 7, day 14 and day 28 after AVF. At day 3 after AVF,  $1\alpha,25(\text{OH})_2\text{D}_3$  level decreased significantly in 1,25 NP group compared to vehicle group with no significant differences at any other time point between the two groups. (E)  $1,25(\text{OH})_2\text{D}_3$  concentration in the outflow vein of animals was measured at day 3 and day 28 after AVF. The average  $1\alpha,25(\text{OH})_2\text{D}_3$  concentration in outflow vein of 1,25 NP treated animals at day 3 was  $19 \pm 3.46$  pg. There was undetectable  $1\alpha,25(\text{OH})_2\text{D}_3$  levels ( $<8$ pg) in the outflow vein at day 3 in the vehicle group. At day 28 after AVF,  $1\alpha,25(\text{OH})_2\text{D}_3$  concentration was undetectable ( $<8$ pg) in the outflow vein in both the groups. Each bar represents mean  $\pm$  SEM of  $n \geq 3$ . Two-way ANOVA was performed.  $**P < 0.01$ , NS: not significant.

#### **Supplemental Figure 4: Immunohistochemical Staining of IER3, Masson's trichrome, and Picrosirius Red Staining**

(A-C) Semiquantitative analysis shows reduction in IER (+) cells in 1,25 NP group compared with vehicle group (intima, media and adventitia) of vessel. (D) Semiquantitative analysis of collagen by picrosirius red staining shows no significant change in the intima layer of vessel. (E-F) Semiquantitative analysis of collagen by picrosirius red staining shows a significant reduction

in the media and adventitia layer of vessel in 1,25 NP group compared with vehicle group. (G) Semiquantitative analysis of collagen by Masson's trichrome staining shows no significant change in the intima layer of vessel. (H-I) Semiquantitative analysis of collagen by Masson's trichrome staining shows a significant reduction in the media and adventitia layer of vessel in 1,25 NP group compared with vehicle group. Each bar represents mean  $\pm$  SEM of  $n \geq 4$ . Non-parametric Mann-Whitney test was performed. \* $P < 0.05$ , \*\* $P < 0.01$ , NS: not significant.

### **Figure 5: Immunohistochemical Staining for $\alpha$ -SMA, Desmin, Vimentin and FSP-1**

(A) Staining for  $\alpha$ -SMA, desmin, vimentin, and FSP-1 on day 28 after AVF creation of outflow vein from vehicle group. The first column is the IgG antibody negative control.  $\alpha$ -SMA, desmin, vimentin, and FSP-1 (+) cells have brown staining (Black arrows). Images were captured at 40X magnification. Right panel shows enlarged view of (+) cells across three different layers (400 X magnifications). (B) Staining for  $\alpha$ -SMA, Desmin, Vimentin and FSP-1 on day 28 after AVF creation of outflow vein from 1,25 NP group. (C) Semiquantitative analysis shows reduction in  $\alpha$ -SMA (+) cells in 1,25 NP group compared with vehicle group. (D) The Semiquantitative analysis shows reduction in desmin positive cells in 1,25 NP group compared with vehicle group. (E) Semiquantitative analysis shows no significant change in vimentin (+) cells in 1,25 NP group compared with the vehicle group. (F) Semiquantitative analysis shows a significant reduction in FSP-1 (+) cells in 1,25 NP group compared with vehicle group. Each bar represents mean  $\pm$  SEM of  $n \geq 4$ . Non-parametric Mann-Whitney test was performed. \*\* $P < 0.01$ . L: lumen, Ad: adventitia, M: media, and I: intima. Scale bar is 500 $\mu$ m and 50 $\mu$ m (panel inset).

### **Supplemental Figure 6: Immunohistochemical Staining for MCP-1 and CD68**

(A) Staining for MCP-1 and CD68 on day 28 after AVF creation of outflow vein from 1,25 NP and vehicle group. The first column is the IgG antibody negative control. MCP-1 and CD68 (+) cells have brown staining. Images were captured at 40X magnification. Right panel shows enlarged view of (+) cells across three different layers (400X magnification). (B) Staining for MCP-1 and CD68 on day 28 after AVF creation of outflow vein from 1,25 NP group. The first column is IgG antibody negative control. MCP-1 and CD68 positive cells have brown staining (Black arrows). (C) Semiquantitative analysis shows reduction in MCP-1 (+) cells in 1,25 NP group compared with vehicle group. (D) Semiquantitative analysis shows reduction in CD68 (+) cells in 1,25 NP group compared with vehicle group. Each bar represents mean  $\pm$  SEM of  $n \geq 3$ . Non-parametric Mann-Whitney test was performed. \* $P < 0.05$ , \*\* $P < 0.01$ . L: lumen, Ad: adventitia, M: media, and I: intima. Scale bar is 500 $\mu$ m and 50 $\mu$ m (panel inset).

### **Supplemental Figure 7: Assessment of Cell Apoptosis and Proliferation in the AVF outflow vein**

Cell death and cell proliferation was assessed using TUNEL and Ki-67 staining, respectively on outflow vein from vehicle and 1,25 NP group. (A) Staining for TUNEL and Ki-67 on day 28 after AVF creation of outflow vein from vehicle group. The first column is the TUNEL negative control. Dark brown nuclei are positive for TUNEL and brown nuclei are positive for Ki-67 (red arrows). Images were captured at 40X magnification. Right panel shows enlarged view of (+) cells from three different layers (400X magnification). (B) Staining for TUNEL and Ki-67 on day 28 after AVF creation of outflow vein from 1,25 NP group. (C) Semiquantitative analysis shows reduction in TUNEL (+) cells in 1,25 NP group compared with vehicle group. (D) Semiquantitative analysis shows reduction in Ki-67 (+) cells in 1,25 NP group compared with

vehicle group. Each bar represents mean  $\pm$  SEM of  $n \geq 4$ . Non-parametric Mann-Whitney test was performed. \* $P < 0.05$ , \*\* $P < 0.01$ . L: lumen, Ad: adventitia, M: media, and I: intima. Scale bar is 500 $\mu$ m and 50 $\mu$ m (panel inset).

### **Supplemental Figure 8: Carstairs and Alizarin-Red S Staining**

Thrombotic component in the tissue sections of AVF outflow veins were assessed by carstairs staining after 28 days of AVF creation. Carstairs staining distinguish platelets (navy blue), fibrin (bright red), collagen (bright blue), muscle (red) and red blood cells (yellow). To measure Calcium deposition, tissue sections of AVF outflow veins were stained with Alizarin Red S stain. Calcium forms an Alizarin Red S- calcium complex which gives orange red color. (A) Carstairs and Alizarin-Red S red staining on day 28 post AVF creation of outflow vein from vehicle group. Images were captured at 40X magnification. Right panel shows enlarged view of positive cells across three different layers (400X magnification). (B) Carstairs and Alizarin-Red S red staining on day 28 post AVF creation of outflow vein from 1,25 NP group shows no thrombosis and calcium deposition. L: lumen, Ad: adventitia, M: media, and I: intima. Scale bar is 500 $\mu$ m and 50 $\mu$ m (panel inset).

### **Supplemental Table 1 - Amount of Drug Delivery**

| Group   | Day    | Pig ID | GA (mm) | GV (mm) | PLGA or Drug amount (µl) | Amount of 1 $\alpha$ ,25(OH) $_2$ D $_3$ delivered (µg) |
|---------|--------|--------|---------|---------|--------------------------|---------------------------------------------------------|
| Vehicle | Day 3  | 17P630 | 1.5     | 3       | 250.00                   | ND                                                      |
|         | Day 3  | 17P631 | 4       | 10      | 832.00                   | ND                                                      |
|         | Day 3  | 17P634 | 4       | 8       | 666.67                   | ND                                                      |
|         | Day 3  | 17P633 | 6       | 11      | 920.00                   | ND                                                      |
|         | Day 3  | 17P635 | 4       | 9       | 750.00                   | ND                                                      |
|         | Day 28 | 17P704 | 4       | 10      | 832.00                   | ND                                                      |
|         | Day 28 | 17P710 | 3       | 6       | 500.00                   | ND                                                      |
|         | Day 28 | 17P699 | 5       | 10      | 832.00                   | ND                                                      |
|         | Day 28 | 17P678 | 2       | 8       | 666.67                   | ND                                                      |
|         | Day 28 | 17P674 | 3       | 9       | 750.00                   | ND                                                      |
| 1,25 NP | Day 3  | 17P649 | 4       | 8       | 666.67                   | 27.78                                                   |
|         | Day 3  | 17P654 | 4       | 9       | 750.00                   | 31.25                                                   |
|         | Day 3  | 17P648 | 3       | 8       | 666.67                   | 27.78                                                   |
|         | Day 3  | 17P650 | 3       | 7       | 583.00                   | 24.29                                                   |
|         | Day 3  | 17P661 | 3       | 6       | 500.00                   | 20.83                                                   |
|         | Day 3  | 17P657 | 3       | 7       | 583.00                   | 24.29                                                   |
|         | Day 28 | 17P651 | 4       | 8       | 666.67                   | 27.78                                                   |
|         | Day 28 | 17P662 | 4       | 9       | 750.00                   | 31.25                                                   |
|         | Day 28 | 17P656 | 5       | 10      | 832.00                   | 34.66                                                   |
|         | Day 28 | 17P663 | 3       | 8       | 666.67                   | 27.78                                                   |
|         | Day 28 | 17P765 | 3       | 9       | 750.00                   | 31.25                                                   |
|         | Day 28 | 17P848 | 4       | 11      | 933.00                   | 38.87                                                   |
|         | Day 28 | 17P847 | 5       | 10      | 832.00                   | 34.66                                                   |
|         | Day 28 | 17P184 | 3       | 8       | 666.67                   | 27.78                                                   |
| Day 28  | 17P185 | 3      | 8       | 666.67  | 27.78                    |                                                         |

Supplemental Table 2 - List of primers used for gene expression analysis

| <b>Gene</b>  | <b>Forward Primer</b>      | <b>Reverse Primer</b>      |
|--------------|----------------------------|----------------------------|
| <b>TBP-1</b> | 5'-GATGGACGTTTCGGTTTAGG-3' | 5'-AGCAGCACAGTACGAGCAA-3'  |
| <b>IER3</b>  | 5'-CGAGTGGTCCGGCGCCA-3'    | 5'-CGACACACCCTCTTCAGCCA-3' |



**Supplemental Table 3 - List of antibodies used for IHC in the present study**

| <b>Antibody</b> | <b>Catalog number</b> | <b>Supplier</b> | <b>Dilution</b> |
|-----------------|-----------------------|-----------------|-----------------|
| CD-68           | ab-125212             | Abcam           | 1:250           |
| FSP-1           | 07/2274               | Millipore Sigma | 1:1000          |
| $\alpha$ -SMA   | ab- 5694              | Abcam           | 1:1000          |
| CD-31           | ab- 28364             | Abcam           | 1:1000          |
| MCP-1           | ab- 25154             | Abcam           | 1:1000          |
| Desmin          | ab- 32362             | Abcam           | 1:2000          |
| Hif-1 $\alpha$  | ab- 2185              | Abcam           | 1:200           |
| Ki-67           | ab- 9260              | Abcam           | 1:200           |
| IER3            | ab- 65152             | Abcam           | 1:150           |
| VEGF-A          | ab- 46154             | Abcam           | 1:800           |
| Vimentin        | ab- 8978              | Abcam           | 1:250           |

**Supplemental Table 4 – Serum Blood Urea Nitrogen (BUN)**

| Group   | Day    | Pig ID | Day-28-CKD | D0-AVF | D3  | D14 | D21 | D28 |
|---------|--------|--------|------------|--------|-----|-----|-----|-----|
| Vehicle | Day 3  | 17P630 |            | 2.3    | 2.4 |     |     |     |
|         | Day 3  | 17P631 |            | 3.6    | 3.7 |     |     |     |
|         | Day 3  | 17P634 | 2.1        | 2.6    | 1.8 |     |     |     |
|         | Day 3  | 17P633 | 2.9        | 2.7    | 1.8 |     |     |     |
|         | Day 3  | 17P635 | 3.2        | 1.8    | 2.2 |     |     |     |
|         | Day 28 | 17P704 | 1.4        | 2.8    | 2.8 | 3.7 | 3.9 | 3   |
|         | Day 28 | 17P710 | 1.6        | 3.9    | 1.9 | 2.9 | 4.2 | 3   |
|         | Day 28 | 17P699 | 2.8        | 5.1    | 4.6 | 4   | 4.8 | 3.2 |
|         | Day 28 | 17P678 | 1.6        | 2.6    | 2.2 | 3.7 | 4.7 | 2   |
|         | Day 28 | 17P674 | 1.8        | 4      | 4.1 | 3.2 | 6.1 | 4.6 |
| 1,25 NP | Day 3  | 17P649 | 1.9        | 2.2    | 2.8 |     |     |     |
|         | Day 3  | 17P654 | 1.8        | 3.4    | 3.3 |     |     |     |
|         | Day 3  | 17P648 | 1.3        | 2.5    | 2.5 |     |     |     |
|         | Day 3  | 17P650 | 2.8        | 2.3    | 2.5 |     |     |     |
|         | Day 3  | 17P661 | 1.8        | 1.7    | 3.3 |     |     |     |
|         | Day 3  | 17P657 | 1.9        | 1.7    | 3   |     |     |     |
|         | Day 28 | 17P651 | 2.5        | 2.9    |     | 2.4 | 2.8 | 2.5 |
|         | Day 28 | 17P662 | 2          | 2.1    |     | 2   |     | 1.7 |
|         | Day 28 | 17P656 | 1.4        | 1.4    | 2.4 | 1.7 | 2.1 | 3.2 |
|         | Day 28 | 17P663 | 1.2        | 2.1    | 2.2 | 2.2 | 2.5 | 3.8 |
|         | Day 28 | 17P765 | 1.2        | 0.9    | 1.1 | 1.1 | 1.3 | 3   |
|         | Day 28 | 17P848 | 2.2        | 1.7    | 3.3 | 2.1 | 3.6 | 2.7 |
|         | Day 28 | 17P847 | 1.1        | 1.7    | 2   | 0.9 | 4.4 |     |
|         | Day 28 | 17P184 | 1          | 2.2    | 5.1 | 2.9 | 1.7 | 2.3 |
| Day 28  | 17P185 | 1.4    | 6.1        | 11.7   | 6.9 | 6.6 | 6.3 |     |

**Supplemental Table 5 – Serum Creatinine ( $\mu\text{mol/L}$ ) Reference Interval 70-168  $\mu\text{mol/L}$** 

| Group   | Day    | Pig ID | Day-28-CKD | D0-AVF | D3  | D7  | D14 | D21 | D28 |
|---------|--------|--------|------------|--------|-----|-----|-----|-----|-----|
| Vehicle | Day 3  | 17P630 |            | 172    | 157 |     |     |     |     |
|         | Day 3  | 17P631 |            | 195    | 152 |     |     |     |     |
|         | Day 3  | 17P634 | 103        | 146    | 151 |     |     |     |     |
|         | Day 3  | 17P633 | 180        | 166    | 166 |     |     |     |     |
|         | Day 3  | 17P635 | 144        | 139    | 131 |     |     |     |     |
|         | Day 28 | 17P704 | 116        | 232    | 227 | 216 | 281 | 190 | 203 |
|         | Day 28 | 17P710 | 112        | 150    | 132 | 140 | 143 | 164 | 159 |
|         | Day 28 | 17P699 | 138        | 197    | 190 | 220 | 230 | 198 | 162 |
|         | Day 28 | 17P678 | 107        | 188    | 154 | 138 | 161 | 165 | 159 |
|         | Day 28 | 17P674 | 113        | 197    | 165 | 174 | 168 | 184 | 192 |
| 1,25 NP | Day 3  | 17P649 | 128        | 145    | 158 |     |     |     |     |
|         | Day 3  | 17P654 | 112        | 177    | 150 |     |     |     |     |
|         | Day 3  | 17P648 | 126        | 166    | 126 |     |     |     |     |
|         | Day 3  | 17P650 | 114        | 148    | 148 |     |     |     |     |
|         | Day 3  | 17P661 | 165        | 85     | 128 |     |     |     |     |
|         | Day 3  | 17P657 | 113        | 143    | 144 |     |     |     |     |
|         | Day 28 | 17P651 | 142        | 136    |     | 130 | 134 | 129 | 128 |
|         | Day 28 | 17P662 | 136        | 199    |     |     | 183 |     | 155 |
|         | Day 28 | 17P656 | 84         | 123    | 122 | 117 | 144 | 146 | 151 |
|         | Day 28 | 17P663 | 113        | 157    | 151 | 168 | 206 | 173 | 174 |
|         | Day 28 | 17P765 | 83         | 102    | 110 |     | 102 | 95  | 111 |
|         | Day 28 | 17P848 | 95         | 124    | 137 | 115 | 178 | 146 | 170 |
|         | Day 28 | 17P847 | 84         | 168    | 170 |     | 68  | 148 |     |
|         | Day 28 | 17P184 | 102        | 160    | 133 | 144 | 153 | 171 | 169 |
| Day 28  | 17P185 | 98     | 340        | 297    | 290 | 307 | 310 | 281 |     |

**Supplemental Table 6 - Serum Calcium (mg/dL) Reference Interval 10.0-11.3 mg/dL**

| Group   | Day    | Pig ID | Day-28-CKD | D0-AVF | D3   | D7   | D14  | D21  | D28  |
|---------|--------|--------|------------|--------|------|------|------|------|------|
| Vehicle | Day 3  | 17P630 |            |        | 10.8 |      |      |      |      |
|         | Day 3  | 17P631 |            |        | 10.3 |      |      |      |      |
|         | Day 3  | 17P634 |            | 10.1   | 10.1 |      |      |      |      |
|         | Day 3  | 17P633 |            | 10.5   | 10.6 |      |      |      |      |
|         | Day 3  | 17P635 |            | 10.5   | 10   |      |      |      |      |
|         | Day 28 | 17P704 | 11.1       | 10.7   | 9.8  | 10.5 | 9.9  | 10   | 9.6  |
|         | Day 28 | 17P710 | 10.7       | 11.4   | 10.6 | 10.8 | 10.4 | 11.2 | 10.8 |
|         | Day 28 | 17P699 | 11         | 11.2   | 10.8 | 11   | 11   | 10.4 | 10.9 |
|         | Day 28 | 17P678 | 10.7       | 11.1   | 10.8 | 10.9 | 10.7 | 9.9  | 10.2 |
|         | Day 28 | 17P674 | 10.8       | 10.2   | 10.2 | 11.2 | 10.3 | 10.7 | 10.3 |
| 1,25 NP | Day 3  | 17P649 | 11.3       | 10.9   | 11   |      |      |      |      |
|         | Day 3  | 17P654 |            | 11.3   | 11.4 |      |      |      |      |
|         | Day 3  | 17P648 |            | 10.7   | 12.8 |      |      |      |      |
|         | Day 3  | 17P650 |            | 10.7   | 12.8 |      |      |      |      |
|         | Day 3  | 17P661 |            | 10.9   | 11.7 |      |      |      |      |
|         | Day 3  | 17P657 |            | 10.9   | 11.5 |      |      |      |      |
|         | Day 28 | 17P651 |            | 10.7   |      | 10.6 | 10.6 | 10.7 | 10.6 |
|         | Day 28 | 17P662 |            | 10.5   |      |      | 9.9  |      | 10   |
|         | Day 28 | 17P656 | 10.4       | 10.2   | 12.8 | 11.1 | 10.7 | 10.3 | 10.7 |
|         | Day 28 | 17P663 | 9.4        | 10.4   | 11.2 | 10.9 | 10.8 | 10.2 | 10.3 |
|         | Day 28 | 17P765 | 11.2       | 10.4   | 10.3 |      | 10.8 | 9.7  | 9.9  |
|         | Day 28 | 17P848 | 11.4       | 11     | 11.3 | 10.4 | 11.1 | 10.1 | 11.3 |
|         | Day 28 | 17P847 | 10.6       | 10.8   | 11.4 |      |      | 10.9 | 9.2  |
|         | Day 28 | 17P184 | 11.4       | 11     | 12.1 | 10.4 | 11.2 | 10.7 | 10.8 |
| Day 28  | 17P185 | 11.6   | 11.3       | 11.7   | 10.7 | 11   | 10.5 | 10.5 |      |

**Supplemental Table 7 - Serum Phosphate (mg/dL) Reference Interval 5.8-7.8 mg/dL**

| Group   | Day    | Pig ID | Day-28-CKD | D0-AVF | D3  | D7   | D14 | D21 | D28 |
|---------|--------|--------|------------|--------|-----|------|-----|-----|-----|
| Vehicle | Day 3  | 17P630 |            |        | 8.5 |      |     |     |     |
|         | Day 3  | 17P631 |            |        | 6.5 |      |     |     |     |
|         | Day 3  | 17P634 |            | 6.8    | 6.7 |      |     |     |     |
|         | Day 3  | 17P633 |            | 6.1    | 6.6 |      |     |     |     |
|         | Day 3  | 17P635 |            | 7.1    | 6.3 |      |     |     |     |
|         | Day 28 | 17P704 | 6.9        | 7.4    |     | 10   | 6.6 | 7.3 | 7.6 |
|         | Day 28 | 17P710 | 6.8        | 7.1    | 6.7 | 9    | 6.3 | 8.9 | 6.4 |
|         | Day 28 | 17P699 | 7.8        | 8      | 7.4 | 10.1 | 7.7 | 6.8 | 6.6 |
|         | Day 28 | 17P678 | 7.3        | 6.8    | 7.4 | 8.3  | 7.2 | 8.7 | 7.5 |
|         | Day 28 | 17P674 | 7.6        | 6.1    | 6   | 9.5  | 7.1 | 7.4 | 10  |
| 1,25 NP | Day 3  | 17P649 | 7.7        | 6.9    | 7   |      |     |     |     |
|         | Day 3  | 17P654 |            | 7.5    | 6.7 |      |     |     |     |
|         | Day 3  | 17P648 |            | 8.2    | 7.7 |      |     |     |     |
|         | Day 3  | 17P650 |            | 7.8    | 7.4 |      |     |     |     |
|         | Day 3  | 17P661 |            | 7.2    | 7   |      |     |     |     |
|         | Day 3  | 17P657 |            |        | 7.2 |      |     |     |     |
|         | Day 28 | 17P651 |            | 7.5    |     | 8    | 7.3 | 8.8 | 7.3 |
|         | Day 28 | 17P662 |            | 6.5    |     |      | 5.9 |     | 6.5 |
|         | Day 28 | 17P656 | 6.7        | 7.2    | 5.9 | 6.9  | 7.6 | 8   | 6.9 |
|         | Day 28 | 17P663 | 6.2        | 7.2    | 5.7 | 8.9  | 7.1 | 6.5 | 6.8 |
|         | Day 28 | 17P765 | 8.58       |        |     |      | 7.5 | 7.5 | 7.2 |
|         | Day 28 | 17P848 | 6.8        | 7      | 8   | 7.7  | 6.3 | 8.4 | 6.5 |
|         | Day 28 | 17P847 | 8.1        | 7.4    | 6.7 |      | 7.5 | 6.5 |     |
|         | Day 28 | 17P184 | 10.4       | 7.9    | 8.2 | 6    | 8.1 | 7.7 | 8.2 |
| Day 28  | 17P185 | 8.9    | 7          | 10.6   | 6.1 | 7.7  | 6.9 | 7.3 |     |

**Supplemental Table 8 - Serum Potassium (mmol/L) Reference Interval 3.9-5.6 mmol/L**

| Group   | Day    | Pig ID | Day-28-CKD | D0-AVF | D3  | D7  | D14 | D21 | D28 |
|---------|--------|--------|------------|--------|-----|-----|-----|-----|-----|
| Vehicle | Day 3  | 17P630 |            |        | 7.6 |     |     |     |     |
|         | Day 3  | 17P631 |            |        | 6.3 |     |     |     |     |
|         | Day 3  | 17P634 |            | 4.4    | 8.3 |     |     |     |     |
|         | Day 3  | 17P633 |            | 4.1    | 6.9 |     |     |     |     |
|         | Day 3  | 17P635 |            | 4.4    | 5.3 |     |     |     |     |
|         | Day 28 | 17P704 | 4.8        | 5.2    | 6.8 | 6.7 | 6.3 | 5.3 | 7.1 |
|         | Day 28 | 17P710 | 6.1        | 6.2    | 5.1 | 6.8 | 5.3 | 7.1 | 6.8 |
|         | Day 28 | 17P699 | 5.8        | 6.2    | 6.2 | 7.6 | 5.4 | 5   | 7.1 |
|         | Day 28 | 17P678 | 6.9        | 6.8    | 5.8 | 7.5 | 5.2 | 6.1 | 7.1 |
|         | Day 28 | 17P674 | 6.6        | 7.2    | 5.7 | 8.5 | 8.5 | 7.6 | 7.4 |
| 1,25 NP | Day 3  | 17P649 | 5.4        | 4.8    | 5.2 |     |     |     |     |
|         | Day 3  | 17P654 |            | 5      | 5.7 |     |     |     |     |
|         | Day 3  | 17P648 |            | 7      | 6.8 |     |     |     |     |
|         | Day 3  | 17P650 |            | 6.8    | 7.1 |     |     |     |     |
|         | Day 3  | 17P661 |            | 5      | 5.4 |     |     |     |     |
|         | Day 3  | 17P657 |            | 5.3    | 5.7 |     |     |     |     |
|         | Day 28 | 17P651 |            | 4.7    |     | 5.4 | 5.2 | 6.6 | 5   |
|         | Day 28 | 17P662 |            | 4.6    |     |     | 4.9 |     | 4.5 |
|         | Day 28 | 17P656 | 5.9        | 4.8    | 6.6 | 7.1 | 7.7 | 6.6 | 5.2 |
|         | Day 28 | 17P663 | 5.9        | 4.9    | 4.6 | 6.7 | 7   | 6.1 | 4.9 |
|         | Day 28 | 17P765 | 7.1        | 5.1    | 4.8 |     | 5.1 | 5   | 5.1 |
|         | Day 28 | 17P848 | 6.7        | 5.3    | 5.5 | 5   | 5.4 | 5.3 | 5.5 |
|         | Day 28 | 17P847 | 6.9        | 4.9    | 5.3 |     | 5   | 5.3 |     |
|         | Day 28 | 17P184 | 7.3        | 4.9    | 5.7 | 4.6 | 7   | 5.2 | 5.2 |
| Day 28  | 17P185 | 7      | 5.1        | 6.2    | 5.4 | 7.3 | 5.3 | 5.3 |     |

**Supplemental Table 9 - Serum Glucose (mg/dl) Reference Interval 48-290 mg/dL**

| Group   | Day    | Pig ID | Day-28-CKD | D0-AVF | D3  | D7  | D14 | D21 | D28 |
|---------|--------|--------|------------|--------|-----|-----|-----|-----|-----|
| Vehicle | Day 3  | 17P630 |            | 99     | 78  |     |     |     |     |
|         | Day 3  | 17P631 |            | 88     | 98  |     |     |     |     |
|         | Day 3  | 17P634 | 113        | 74     | 118 |     |     |     |     |
|         | Day 3  | 17P633 | 124        | 95     | 116 |     |     |     |     |
|         | Day 3  | 17P635 | 112        | 93     | 104 |     |     |     |     |
|         | Day 28 | 17P704 | 152        | 86     | 93  | 84  | 93  | 97  | 71  |
|         | Day 28 | 17P710 | 139        | 109    | 99  | 109 | 85  | 100 | 83  |
|         | Day 28 | 17P699 | 62         | 81     | 98  | 96  | 74  | 81  | 93  |
|         | Day 28 | 17P678 | 81         | 90     | 105 | 76  | 77  | 88  | 91  |
|         | Day 28 | 17P674 | 81         | 99     | 104 | 84  | 103 | 85  | 99  |
| 1,25 NP | Day 3  | 17P649 | 131        | 123    | 119 |     |     |     |     |
|         | Day 3  | 17P654 | 126        | 144    | 93  |     |     |     |     |
|         | Day 3  | 17P648 | 147        | 96     | 106 |     |     |     |     |
|         | Day 3  | 17P650 | 126        | 87     | 107 |     |     |     |     |
|         | Day 3  | 17P661 | 133        | 78     | 87  |     |     |     |     |
|         | Day 3  | 17P657 | 83         | 87     | 104 |     |     |     |     |
|         | Day 28 | 17P651 | 181        | 115    |     | 87  | 110 | 76  | 113 |
|         | Day 28 | 17P662 | 187        | 96     |     |     | 109 |     | 101 |
|         | Day 28 | 17P656 | 74         | 82     | 97  | 72  | 84  | 89  | 98  |
|         | Day 28 | 17P663 | 86         | 85     | 107 | 92  | 119 | 80  | 99  |
|         | Day 28 | 17P765 | 96         | 89     | 108 |     | 97  | 101 | 114 |
|         | Day 28 | 17P848 | 83         | 95     | 101 | 113 | 104 | 101 | 103 |
|         | Day 28 | 17P847 | 95         | 77     | 101 |     | 91  | 101 |     |
|         | Day 28 | 17P184 | 134        | 99     | 108 | 97  | 119 | 108 | 105 |
| Day 28  | 17P185 | 160    | 116        | 128    | 170 | 142 | 88  | 106 |     |

**Supplemental Table 10 - Serum Albumin (g/dL) Reference Interval 3.3-4.8 g/dL**

| Group   | Day    | Pig ID | Day-28-CKD | D0-AVF | D3  | D7  | D14 | D21 | D28 |
|---------|--------|--------|------------|--------|-----|-----|-----|-----|-----|
| Vehicle | Day 3  | 17P630 |            |        | 3.6 |     |     |     |     |
|         | Day 3  | 17P631 |            |        | 3.9 |     |     |     |     |
|         | Day 3  | 17P634 |            | 4.1    | 4.1 |     |     |     |     |
|         | Day 3  | 17P633 |            | 3.6    | 3.2 |     |     |     |     |
|         | Day 3  | 17P635 |            | 3.7    | 3.4 |     |     |     |     |
|         | Day 28 | 17P704 | 3.3        | 3.2    | 3   | 3.4 | 3.5 | 3.3 | 3   |
|         | Day 28 | 17P710 | 3.2        | 3.6    | 3.6 | 3.8 | 3.3 | 3.9 | 3.7 |
|         | Day 28 | 17P699 | 3.8        | 2.5    | 2.9 | 3.2 | 2.9 | 3.1 | 3.7 |
|         | Day 28 | 17P678 | 3.6        | 3.2    | 2.9 | 3.3 | 3.3 | 3   | 3.4 |
|         | Day 28 | 17P674 | 3.6        | 3.6    | 3   | 3.6 | 3.5 | 3.7 | 3.6 |
| 1,25 NP | Day 3  | 17P649 | 3.7        | 3.7    | 3.7 |     |     |     |     |
|         | Day 3  | 17P654 |            | 3.8    | 3.7 |     |     |     |     |
|         | Day 3  | 17P648 |            | 3.9    | 3.5 |     |     |     |     |
|         | Day 3  | 17P650 |            | 3.4    | 3.2 |     |     |     |     |
|         | Day 3  | 17P661 |            | 2.6    | 2.7 |     |     |     |     |
|         | Day 3  | 17P657 |            | 3.8    | 3.8 |     |     |     |     |
|         | Day 28 | 17P651 |            | 3.8    |     | 3.7 | 3.7 | 3.6 | 3.4 |
|         | Day 28 | 17P662 |            | 3.9    |     |     | 3.7 |     | 3.4 |
|         | Day 28 | 17P656 | 3.8        | 3.6    | 3   | 3.2 | 3.3 | 3.2 | 3.9 |
|         | Day 28 | 17P663 | 3.3        | 3.1    | 2.7 | 3.1 | 3.2 | 3   | 3.4 |
|         | Day 28 | 17P765 | 3.9        | 3.1    | 3.2 |     | 3.6 | 3.2 | 3.1 |
|         | Day 28 | 17P848 | 3.4        | 2.9    | 3.1 | 3.2 | 3.4 | 3.6 | 3.8 |
|         | Day 28 | 17P847 | 3.8        | 3.4    | 3.5 |     | 3.7 | 1.9 |     |
|         | Day 28 | 17P184 | 3.7        | 3.5    | 3.1 | 3.3 | 3.1 | 3.6 | 3.4 |
| Day 28  | 17P185 | 3.8    | 3.5        | 3.6    | 3.6 | 3.5 | 3.9 | 3.9 |     |



**Supplemental Table 11 - Serum Total Carbon Dioxide (mol/L) Reference Interval: 26-35 mol/L**

| Group   | Day    | Pig ID | Day-28-CKD | D0-AVF | D3 | D7 | D14 | D21 | D28 |
|---------|--------|--------|------------|--------|----|----|-----|-----|-----|
| Vehicle | Day 3  | 17P630 |            |        | 33 |    |     |     |     |
|         | Day 3  | 17P631 |            |        | 31 |    |     |     |     |
|         | Day 3  | 17P634 |            | 31     | 31 |    |     |     |     |
|         | Day 3  | 17P633 |            | 29     | 30 |    |     |     |     |
|         | Day 3  | 17P635 |            | 30     | 31 |    |     |     |     |
|         | Day 28 | 17P704 | 30         | 31     | 28 | 35 | 20  | 32  | 29  |
|         | Day 28 | 17P710 | 33         | 35     | 34 | 33 | 31  | 37  | 32  |
|         | Day 28 | 17P699 | 33         | 31     | 31 | 32 | 31  | 31  | 32  |
|         | Day 28 | 17P678 | 32         | 34     | 33 | 32 | 32  | 35  | 31  |
|         | Day 28 | 17P674 | 27         | 32     | 30 | 34 | 31  | 30  | 35  |
| 1,25 NP | Day 3  | 17P649 | 31         | 31     | 31 |    |     |     |     |
|         | Day 3  | 17P654 |            | 34     | 31 |    |     |     |     |
|         | Day 3  | 17P648 |            | 30     | 34 |    |     |     |     |
|         | Day 3  | 17P650 |            | 32     | 32 |    |     |     |     |
|         | Day 3  | 17P661 |            | 32     | 31 |    |     |     |     |
|         | Day 3  | 17P657 |            | 33     | 33 |    |     |     |     |
|         | Day 28 | 17P651 |            | 30     |    | 36 | 29  | 35  | 29  |
|         | Day 28 | 17P662 |            | 33     |    |    | 31  |     | 29  |
|         | Day 28 | 17P656 | 31         | 32     | 33 | 32 | 29  | 31  | 31  |
|         | Day 28 | 17P663 | 28         | 31     | 31 | 32 | 32  | 31  | 32  |
|         | Day 28 | 17P765 | 33         | 34     | 34 |    | 32  | 31  | 33  |
|         | Day 28 | 17P848 | 34         | 31     |    |    | 22  | 32  | 32  |
|         | Day 28 | 17P847 | 34         | 30     | 34 |    | 31  | 33  |     |
|         | Day 28 | 17P184 | 31         | 33     | 33 | 31 | 30  | 32  | 31  |
| Day 28  | 17P185 | 30     | 29         | 33     | 28 | 31 | 29  | 33  |     |

**Supplemental Table 12 - Serum Sodium (mmol/L) Reference Interval: 135-150 mmol/L**

| <b>Group</b>   | <b>Day</b> | <b>Pig ID</b> | <b>Day-28-CKD</b> | <b>D0-AVF</b> | <b>D3</b> | <b>D7</b> | <b>D14</b> | <b>D21</b> | <b>D28</b> |
|----------------|------------|---------------|-------------------|---------------|-----------|-----------|------------|------------|------------|
| <b>Vehicle</b> | Day 3      | 17P630        |                   |               | 142       |           |            |            |            |
|                | Day 3      | 17P631        |                   |               | 131       |           |            |            |            |
|                | Day 3      | 17P634        |                   | 126           | 129       |           |            |            |            |
|                | Day 3      | 17P633        |                   | 126           | 128       |           |            |            |            |
|                | Day 3      | 17P635        |                   | 132           | 130       |           |            |            |            |
|                | Day 28     | 17P704        | 141               | 138           | 137       | 147       | 128        | 134        | 133        |
|                | Day 28     | 17P710        | 133               | 145           | 149       | 140       | 170        | 144        | 142        |
|                | Day 28     | 17P699        | 136               | 143           | 138       | 140       | 141        | 135        | 142        |
|                | Day 28     | 17P678        | 138               | 142           | 143       | 145       | 141        | 142        | 134        |
|                | Day 28     | 17P674        | 137               | 141           | 142       | 147       | 142        | 140        | 143        |
| <b>1,25 NP</b> | Day 3      | 17P649        | 141               | 138           | 138       |           |            |            |            |
|                | Day 3      | 17P654        |                   | 139           | 140       |           |            |            |            |
|                | Day 3      | 17P648        |                   | 140           | 138       |           |            |            |            |
|                | Day 3      | 17P650        |                   | 138           | 139       |           |            |            |            |
|                | Day 3      | 17P661        |                   | 133           | 134       |           |            |            |            |
|                | Day 3      | 17P657        |                   | 137           | 141       |           |            |            |            |
|                | Day 28     | 17P651        |                   | 142           |           | 139       | 141        | 144        | 140        |
|                | Day 28     | 17P662        |                   | 136           |           |           | 130        |            | 130        |
|                | Day 28     | 17P656        | 133               | 138           | 141       | 144       | 141        | 143        | 137        |
|                | Day 28     | 17P663        | 124               | 136           | 138       | 141       | 142        | 134        | 142        |
|                | Day 28     | 17P765        | 139               | 135           | 130       |           | 139        | 143        | 140        |
|                | Day 28     | 17P848        | 140               | 143           |           |           |            |            | 143        |
|                | Day 28     | 17P847        | 136               | 139           | 145       |           | 138        | 137        |            |
|                | Day 28     | 17P184        | 141               | 135           | 142       | 129       | 139        | 135        | 135        |
| Day 28         | 17P185     | 146           | 135               | 146           | 138       | 138       | 143        | 140        |            |

**Supplemental Table 13 – Serum Chloride (mmol/L) Reference Interval: 98-106 mmol/L**

| Group   | Day    | Pig ID | Day-28-CKD | D0-AVF | D3  | D7  | D14 | D21 | D28 |
|---------|--------|--------|------------|--------|-----|-----|-----|-----|-----|
| Vehicle | Day 3  | 17P630 |            |        | 102 |     |     |     |     |
|         | Day 3  | 17P631 |            |        | 91  |     |     |     |     |
|         | Day 3  | 17P634 |            | 88     | 87  |     |     |     |     |
|         | Day 3  | 17P633 |            | 83     | 89  |     |     |     |     |
|         | Day 3  | 17P635 |            | 93     | 92  |     |     |     |     |
|         | Day 28 | 17P704 | 102        | 98     | 96  | 99  | 86  | 91  | 92  |
|         | Day 28 | 17P710 | 95         | 104    | 101 | 94  | 121 | 101 | 100 |
|         | Day 28 | 17P699 | 94         | 99     | 98  | 100 | 100 | 98  | 101 |
|         | Day 28 | 17P678 | 99         | 98     | 98  | 96  | 100 | 96  | 86  |
|         | Day 28 | 17P674 | 100        | 97     | 111 | 92  | 94  |     |     |
| 1,25 NP | Day 3  | 17P649 | 101        | 99     | 95  | 99  |     |     |     |
|         | Day 3  | 17P654 |            | 95     | 100 |     |     |     |     |
|         | Day 3  | 17P648 |            | 105    | 96  |     |     |     |     |
|         | Day 3  | 17P650 |            | 97     | 100 |     |     |     |     |
|         | Day 3  | 17P661 |            | 97     | 103 |     |     |     |     |
|         | Day 3  | 17P657 |            | 100    | 101 |     |     |     |     |
|         | Day 28 | 17P651 |            | 109    |     | 96  | 103 | 97  | 104 |
|         | Day 28 | 17P662 |            | 136    |     |     | 130 |     | 130 |
|         | Day 28 | 17P656 | 90         | 102    | 108 | 97  | 101 | 99  | 96  |
|         | Day 28 | 17P663 | 82         | 96     | 99  | 100 | 102 | 98  | 102 |
|         | Day 28 | 17P765 | 93         | 87     | 84  |     | 94  | 95  | 92  |
|         | Day 28 | 17P848 | 99         | 97     |     |     |     |     | 96  |
|         | Day 28 | 17P847 | 91         | 95     | 99  |     |     | 96  | 94  |
|         | Day 28 | 17P184 | 99         | 96     | 97  | 92  | 101 | 95  | 93  |
|         | Day 28 | 17P185 | 100        | 95     | 93  | 95  | 100 | 99  | 101 |

**Supplemental Table 14 - Weight (kg) of animals**

| <b>Group</b>   | <b>Day</b> | <b>Pig ID</b> | <b>Day-28-CKD</b> | <b>D0-AVF</b> | <b>D3</b> | <b>D14</b> | <b>D28</b> |
|----------------|------------|---------------|-------------------|---------------|-----------|------------|------------|
| <b>Vehicle</b> | Day 3      | 17P630        | 49.7              | 53            | 57        |            |            |
|                | Day 3      | 17P631        | 48                | 52            | 59        |            |            |
|                | Day 3      | 17P634        |                   | 54            | 56        |            |            |
|                | Day 3      | 17P633        | 47                | 58            | 58        |            |            |
|                | Day 3      | 17P635        | 48                | 53            | 56        |            |            |
|                | Day 28     | 17P704        | 58                | 62            | 64        | 66         | 74         |
|                | Day 28     | 17P710        | 47                | 51            | 53        | 57         | 59         |
|                | Day 28     | 17P699        | 52                | 60            | 60        | 60         | 63         |
|                | Day 28     | 17P678        | 50                | 55            | 57        | 57         |            |
|                | Day 28     | 17P674        | 52                | 62            | 63        | 64         | 68         |
| <b>1,25 NP</b> | Day 3      | 17P649        | 50                | 54            | 54        |            |            |
|                | Day 3      | 17P654        | 48                |               | 52        |            |            |
|                | Day 3      | 17P648        | 45                | 50            | 50        |            |            |
|                | Day 3      | 17P650        | 45                | 52            | 54        |            |            |
|                | Day 3      | 17P661        | 49                | 55            | 56        |            |            |
|                | Day 3      | 17P657        | 49                | 55            | 56        |            |            |
|                | Day 28     | 17P651        | 47                | 55            | 56        | 58         | 62         |
|                | Day 28     | 17P662        | 48                | 54            | 55        | 58         | 62         |
|                | Day 28     | 17P656        | 57.8              | 59            | 61        | 63         | 70         |
|                | Day 28     | 17P663        | 59                | 57            | 57        | 59         | 64         |
|                | Day 28     | 17P765        | 54                | 59            | 61        | 62         | 63         |
|                | Day 28     | 17P848        | 49                | 55            | 53        | 60         | 57         |
|                | Day 28     | 17P847        | 54                | 61            | 64        | 66         | 70         |
|                | Day 28     | 17P184        | 46                | 53            | 57        | 57         | 66         |
| Day 28         | 17P185     | 45            | 48                | 52            | 52        | 54         |            |

**Supplemental Table 15 - Systolic Blood Pressure (mm Hg) of animals**

| <b>Group</b>   | <b>Day</b> | <b>Pig ID</b> | <b>Day-28-CKD</b> | <b>D0-AVF</b> | <b>D3</b> | <b>D14</b> | <b>D28</b> |
|----------------|------------|---------------|-------------------|---------------|-----------|------------|------------|
| <b>Vehicle</b> | Day 3      | 17P630        | 124               | 89            | 123       |            |            |
|                | Day 3      | 17P631        | 113               | 93            | 95        |            |            |
|                | Day 3      | 17P634        | 104               | 109           | 100       |            |            |
|                | Day 3      | 17P633        | 111               | 95            | 87        |            |            |
|                | Day 3      | 17P635        | 120               | 135           | 95        |            |            |
|                | Day 28     | 17P704        | 117               | 100           | 75        |            | 86         |
|                | Day 28     | 17P710        | 100               | 119           | 109       | 99         | 99         |
|                | Day 28     | 17P699        | 114               | 120           | 72        | 103        | 122        |
|                | Day 28     | 17P678        | 102               | 167           | 128       | 112        | 91         |
|                | Day 28     | 17P674        | 123               | 116           | 96        | 126        | 100        |
| <b>1,25 NP</b> | Day 3      | 17P649        | 112               | 134           | 60        |            |            |
|                | Day 3      | 17P654        | 117               | 140           | 100       |            |            |
|                | Day 3      | 17P648        | 159               | 139           | 138       |            |            |
|                | Day 3      | 17P650        | 100               | 149           |           |            |            |
|                | Day 3      | 17P661        | 102               | 121           | 84        |            |            |
|                | Day 3      | 17P657        | 138               | 100           | 84        |            |            |
|                | Day 28     | 17P651        | 105               | 124           |           | 112        |            |
|                | Day 28     | 17P662        | 135               | 155           | 94        | 85         | 76         |
|                | Day 28     | 17P656        | 111               | 109           | 104       | 88         | 85         |
|                | Day 28     | 17P663        | 131               | 117           | 110       | 100        | 100        |
|                | Day 28     | 17P765        | 87                | 120           | 110       | 80         | 111        |
|                | Day 28     | 17P848        | 118               | 146           | 111       | 126        | 104        |
|                | Day 28     | 17P847        | 125               | 178           | 127       | 133        | 130        |
|                | Day 28     | 17P184        | 125               | 105           | 101       | 106        | 108        |
| Day 28         | 17P185     | 125           | 151               | 134           | 98        | 60         |            |

**Supplemental Table 16 - Diastolic Blood Pressure (mm Hg) of animals**

| <b>Group</b>   | <b>Day</b> | <b>Pig ID</b> | <b>Day-28-CKD</b> | <b>D0-AVF</b> | <b>D3</b> | <b>D14</b> | <b>D28</b> |
|----------------|------------|---------------|-------------------|---------------|-----------|------------|------------|
| <b>Vehicle</b> | Day 3      | 17P630        | 97                | 72            | 27        |            |            |
|                | Day 3      | 17P631        | 66                | 72            | 25        |            |            |
|                | Day 3      | 17P634        | 73                | 77            | 70        |            |            |
|                | Day 3      | 17P633        | 76                | 57            | 57        |            |            |
|                | Day 3      | 17P635        | 60                | 84            | 37        |            |            |
|                | Day 28     | 17P704        | 70                | 60            | 66        |            | 60         |
|                | Day 28     | 17P710        | 69                | 60            | 70        | 32         | 44         |
|                | Day 28     | 17P699        | 82                | 75            | 48        | 95         | 64         |
|                | Day 28     | 17P678        | 66                | 100           | 78        | 85         | 74         |
|                | Day 28     | 17P674        | 76                | 86            | 48        | 82         | 61         |
| <b>1,25 NP</b> | Day 3      | 17P649        | 74                | 81            | 29        |            |            |
|                | Day 3      | 17P654        | 68                | 76            | 60        |            |            |
|                | Day 3      | 17P648        | 96                | 81            | 82        |            |            |
|                | Day 3      | 17P650        | 60                | 92            |           |            |            |
|                | Day 3      | 17P661        | 61                | 77            | 44        |            |            |
|                | Day 3      | 17P657        | 94                | 60            | 37        |            |            |
|                | Day 28     | 17P651        | 72                | 104           |           | 55         |            |
|                | Day 28     | 17P662        | 91                | 139           | 70        | 22         |            |
|                | Day 28     | 17P656        | 84                | 76            | 63        | 31         |            |
|                | Day 28     | 17P663        | 87                | 91            | 61        | 60         | 60         |
|                | Day 28     | 17P765        | 60                | 92            | 64        | 35         |            |
|                | Day 28     | 17P848        | 78                | 129           | 64        | 81         | 51         |
|                | Day 28     | 17P847        | 93                | 98            | 76        | 65         | 73         |
|                | Day 28     | 17P184        | 73                | 74            | 66        | 32         |            |
|                | Day 28     | 17P185        | 76                | 95            | 89        | 50         | 40         |

**Supplemental Table 17: List of up-regulated genes**

| No. | Gene ID | FC       | P value  |
|-----|---------|----------|----------|
| 1   | ASB14   | 9.250692 | 0.0084   |
| 2   | MSTN    | 7.290248 | 0.027345 |
| 3   | PGR     | 5.333856 | 0.043648 |
| 4   | RGS20   | 4.522766 | 0.01529  |
| 5   | DEPDC1  | 3.943256 | 0.046998 |
| 6   | CENPE   | 3.831751 | 0.024299 |
| 7   | PATE2   | 3.796451 | 0.045171 |
| 8   | SKA1    | 3.78377  | 0.046623 |
| 9   | PLK4    | 3.126458 | 0.032409 |
| 10  | DIAPH3  | 2.935054 | 0.048502 |
| 11  | SLC12A3 | 2.751029 | 0.023585 |
| 12  | DNA2    | 2.691887 | 0.041461 |
| 13  | ANLN    | 2.579628 | 0.030532 |
| 14  | OIP5    | 2.538655 | 0.021684 |
| 15  | MRPL57  | 2.459472 | 0.045428 |
| 16  | GINS1   | 2.309519 | 0.046345 |
| 17  | CCDC34  | 2.289362 | 0.004697 |
| 18  | EDIL3   | 2.260181 | 0.040446 |
| 19  | C3orf80 | 2.243055 | 0.015601 |
| 20  | CDCA7   | 2.237151 | 0.036949 |
| 21  | CX3CR1  | 2.179689 | 0.020032 |
| 22  | HSP90B1 | 2.0584   | 0.048371 |
| 23  | CCNYL1  | 2.058294 | 0.044803 |
| 24  | PSPH    | 2.0327   | 0.004292 |
| 25  | DYNLL1  | 2.018773 | 0.013449 |
| 26  | DNAAF2  | 2.012881 | 0.039966 |
| 27  | ZNF165  | 1.981543 | 0.019562 |
| 28  | TPM4    | 1.942128 | 0.021982 |
| 29  | IQCM    | 1.92568  | 0.001897 |
| 30  | TYMS    | 1.900281 | 0.039962 |
| 31  | PFN4    | 1.879708 | 0.033573 |
| 32  | TP53I3  | 1.863181 | 0.024668 |
| 33  | SMIM26  | 1.858475 | 0.03838  |
| 34  | TXNDC17 | 1.813372 | 0.039047 |
| 35  | TIPIN   | 1.802911 | 0.048256 |
| 36  | MRPL34  | 1.746083 | 0.018929 |
| 37  | SKA2    | 1.738854 | 0.042262 |
| 38  | LXN     | 1.737432 | 0.046051 |
| 39  | ZYG11A  | 1.730904 | 0.027811 |
| 40  | RHNO1   | 1.714195 | 0.036683 |
| 41  | KLF10   | 1.711293 | 0.044458 |
| 42  | KCTD21  | 1.692636 | 0.013793 |

|    |         |          |          |
|----|---------|----------|----------|
| 43 | ATG3    | 1.661655 | 0.045707 |
| 44 | KDEL3   | 1.639926 | 0.030055 |
| 45 | PTMA    | 1.632855 | 0.039463 |
| 46 | COPB2   | 1.626082 | 0.046192 |
| 47 | LRRC59  | 1.614715 | 0.03611  |
| 48 | CDK2AP1 | 1.614474 | 0.004215 |
| 49 | MRPL51  | 1.614205 | 0.036713 |
| 50 | MORF4L2 | 1.611351 | 0.037198 |
| 51 | PRIM2   | 1.579919 | 0.03011  |
| 52 | RPA3    | 1.548575 | 0.030613 |
| 53 | NUDT15  | 1.529794 | 0.034459 |



**Supplemental Table 18: List of down-regulated genes**

| <b>No.</b> | <b>Gene Id</b> | <b>FC</b> | <b>P value</b> |
|------------|----------------|-----------|----------------|
| 1          | UBE2J2         | 0.749901  | 0.040129       |
| 2          | PRDM2          | 0.74886   | 0.013221       |
| 3          | BAZ2A          | 0.745429  | 0.016028       |
| 4          | UBIAD1         | 0.744883  | 0.015997       |
| 5          | ORAI1          | 0.743355  | 0.045583       |
| 6          | HPS4           | 0.742911  | 0.025784       |
| 7          | TGIF2          | 0.742171  | 0.01417        |
| 8          | ARHGAP6        | 0.741817  | 0.011973       |
| 9          | TSPAN14        | 0.740569  | 0.04458        |
| 10         | STAT5B         | 0.740536  | 0.007838       |
| 11         | REEP2          | 0.740149  | 0.027948       |
| 12         | MAP3K4         | 0.739456  | 0.01929        |
| 13         | RP9            | 0.737553  | 0.006134       |
| 14         | ICAM2          | 0.735043  | 0.049196       |
| 15         | DTX2           | 0.734624  | 0.041941       |
| 16         | DALRD3         | 0.733604  | 0.04932        |
| 17         | WDFY2          | 0.732598  | 0.02475        |
| 18         | AFF1           | 0.732515  | 0.006793       |
| 19         | ADD1           | 0.731821  | 0.0499         |
| 20         | ATXN7L1        | 0.731081  | 0.033009       |
| 21         | HIPK2          | 0.730653  | 0.012315       |
| 22         | PIGO           | 0.727847  | 0.04619        |
| 23         | UBOX5          | 0.726416  | 0.024872       |
| 24         | NINJ1          | 0.726285  | 0.006152       |
| 25         | PRKAG2         | 0.725874  | 0.0106         |
| 26         | SRRM2          | 0.725395  | 0.031366       |
| 27         | FANCG          | 0.725276  | 0.045619       |
| 28         | NUP214         | 0.723926  | 0.035968       |
| 29         | ARID1B         | 0.723866  | 0.044074       |
| 30         | CNNM4          | 0.722342  | 0.01567        |
| 31         | PDPR           | 0.721078  | 0.030765       |
| 32         | RAMP2          | 0.720933  | 0.033006       |
| 33         | PLEKHO1        | 0.720656  | 0.045793       |
| 34         | TMPPE          | 0.720412  | 0.007337       |
| 35         | ERMARD         | 0.71938   | 0.025348       |
| 36         | PHF12          | 0.717344  | 0.018159       |
| 37         | NRDE2          | 0.717343  | 0.02207        |
| 38         | RMND5B         | 0.717017  | 0.014604       |
| 39         | GCC1           | 0.716944  | 0.036637       |
| 40         | NFRKB          | 0.715334  | 0.013542       |
| 41         | FANCF          | 0.714515  | 0.0437         |
| 42         | SPATA2         | 0.71325   | 0.007213       |

|    |          |          |          |
|----|----------|----------|----------|
| 43 | SMARCD2  | 0.712389 | 0.039265 |
| 44 | RPS28    | 0.711472 | 0.043232 |
| 45 | S1PR1    | 0.710613 | 0.043987 |
| 46 | TDRD10   | 0.71032  | 0.046195 |
| 47 | CNNM3    | 0.709363 | 0.002276 |
| 48 | PHYKPL   | 0.708837 | 0.03126  |
| 49 | ATXN2L   | 0.706926 | 0.034626 |
| 50 | LRRC8B   | 0.705227 | 0.049791 |
| 51 | MPPE1    | 0.704104 | 0.022071 |
| 52 | INSR     | 0.703612 | 0.020042 |
| 53 | UBL7     | 0.702408 | 0.044898 |
| 54 | PPIP5K1  | 0.702262 | 0.03328  |
| 55 | INO80C   | 0.701828 | 0.016783 |
| 56 | PISD     | 0.701318 | 0.030385 |
| 57 | SMARCD1  | 0.700524 | 0.04014  |
| 58 | CREBBP   | 0.70021  | 0.009367 |
| 59 | GFOD1    | 0.699749 | 0.004079 |
| 60 | ZFAND3   | 0.69896  | 0.031653 |
| 61 | TAF8     | 0.697952 | 0.027581 |
| 62 | C6orf136 | 0.697517 | 0.03412  |
| 63 | PRKCE    | 0.695442 | 0.005486 |
| 64 | MTMR14   | 0.693945 | 0.00768  |
| 65 | APBA1    | 0.693357 | 0.01595  |
| 66 | MARCHF8  | 0.690294 | 0.009041 |
| 67 | BRI3     | 0.689644 | 0.021584 |
| 68 | PPP1R3B  | 0.689293 | 0.037275 |
| 69 | ARID3B   | 0.689042 | 0.046081 |
| 70 | MKNK1    | 0.688224 | 0.004598 |
| 71 | AMBRA1   | 0.687408 | 0.042555 |
| 72 | SH3D19   | 0.687401 | 0.041737 |
| 73 | MPP1     | 0.687252 | 0.024454 |
| 74 | HSD17B8  | 0.686369 | 0.021658 |
| 75 | PXN      | 0.683836 | 0.043395 |
| 76 | NFATC1   | 0.682159 | 0.048212 |
| 77 | PWWP3A   | 0.680645 | 0.030866 |
| 78 | SLC5A10  | 0.680106 | 0.029207 |
| 79 | PYGM     | 0.680096 | 0.01741  |
| 80 | WASF2    | 0.679911 | 0.004091 |
| 81 | MOB3A    | 0.679583 | 0.048591 |
| 82 | CAPS     | 0.678497 | 0.041282 |
| 83 | FZD4     | 0.676814 | 0.004169 |
| 84 | VMAC     | 0.676332 | 0.040179 |
| 85 | ADRB2    | 0.675021 | 0.020692 |
| 86 | BRD4     | 0.674364 | 0.009359 |
| 87 | NAGK     | 0.673816 | 0.035186 |

|     |              |          |          |
|-----|--------------|----------|----------|
| 88  | PACSIN2      | 0.6738   | 0.0241   |
| 89  | SLC9A8       | 0.673626 | 0.001933 |
| 90  | REELD1       | 0.670934 | 0.038137 |
| 91  | FNIP2        | 0.670671 | 0.004876 |
| 92  | MAP3K3       | 0.670656 | 0.001432 |
| 93  | NDUFAF3      | 0.670231 | 0.017113 |
| 94  | CCDC189      | 0.669882 | 0.045682 |
| 95  | FOXO1        | 0.668814 | 0.041969 |
| 96  | ANGEL1       | 0.668462 | 0.03663  |
| 97  | SLCO2B1      | 0.667781 | 0.022602 |
| 98  | B3GNT3       | 0.667565 | 0.024819 |
| 99  | EP400        | 0.666781 | 0.047907 |
| 100 | ANKZF1       | 0.666246 | 0.038989 |
| 101 | STAT5A       | 0.665632 | 0.044792 |
| 102 | ZFYVE1       | 0.662952 | 0.026502 |
| 103 | ZNF217       | 0.661514 | 0.024524 |
| 104 | MAST3        | 0.661041 | 0.018361 |
| 105 | EFCAB8       | 0.660614 | 0.03607  |
| 106 | YJU2         | 0.660224 | 0.032449 |
| 107 | DAZAP1       | 0.660222 | 0.003724 |
| 108 | MRPS18A      | 0.658926 | 0.031796 |
| 109 | TSC1         | 0.658668 | 0.032864 |
| 110 | RDH16        | 0.657836 | 0.020988 |
| 111 | BICRAL       | 0.656541 | 0.049095 |
| 112 | LRRK1        | 0.656336 | 0.011094 |
| 113 | CECR2        | 0.656029 | 0.010888 |
| 114 | EZH1         | 0.655901 | 0.018357 |
| 115 | ZNF174       | 0.655623 | 0.038889 |
| 116 | PLBD2        | 0.65478  | 0.011784 |
| 117 | MFNG         | 0.654543 | 0.035394 |
| 118 | MIDEAS       | 0.653732 | 0.004296 |
| 119 | CORO2A       | 0.6533   | 0.013114 |
| 120 | TRMU         | 0.65282  | 0.033338 |
| 121 | ssc-mir-7142 | 0.652542 | 0.010705 |
| 122 | CSAD         | 0.652157 | 0.016567 |
| 123 | ME3          | 0.651782 | 0.002455 |
| 124 | SFMBT2       | 0.651534 | 0.03187  |
| 125 | POLL         | 0.650534 | 0.046336 |
| 126 | DAPK1        | 0.650513 | 0.011241 |
| 127 | SYNE3        | 0.650499 | 0.046976 |
| 128 | SAG          | 0.650318 | 0.036631 |
| 129 | RGL1         | 0.649534 | 0.024876 |
| 130 | USF2         | 0.649488 | 0.029187 |
| 131 | NUDT17       | 0.648814 | 0.038907 |
| 132 | CRTC3        | 0.648361 | 0.005493 |

|     |          |          |          |
|-----|----------|----------|----------|
| 133 | PSKH1    | 0.64808  | 0.027437 |
| 134 | SCNN1A   | 0.647387 | 0.008464 |
| 135 | ZNRF3    | 0.64699  | 0.03314  |
| 136 | WBP2     | 0.646614 | 0.006765 |
| 137 | ZNF672   | 0.646365 | 0.013106 |
| 138 | SLC25A28 | 0.646156 | 0.048272 |
| 139 | FCSK     | 0.645863 | 0.020111 |
| 140 | RUBCNL   | 0.644536 | 0.018427 |
| 141 | FOXRED2  | 0.644256 | 0.036103 |
| 142 | CYB561A3 | 0.643942 | 0.01219  |
| 143 | ZFYVE27  | 0.641753 | 0.024301 |
| 144 | TYK2     | 0.638475 | 0.027256 |
| 145 | NISCH    | 0.637768 | 0.044905 |
| 146 | ATG13    | 0.637528 | 0.009848 |
| 147 | CHKA     | 0.637183 | 0.002633 |
| 148 | CCDC69   | 0.635351 | 0.038458 |
| 149 | PSTPIP1  | 0.633273 | 0.038165 |
| 150 | RHBDD2   | 0.631657 | 0.024366 |
| 151 | GGA2     | 0.63029  | 0.004293 |
| 152 | KDM8     | 0.629716 | 0.043815 |
| 153 | IRS2     | 0.629094 | 0.011258 |
| 154 | LURAP1   | 0.628632 | 0.025261 |
| 155 | SH2D3C   | 0.628346 | 0.017336 |
| 156 | FHDC1    | 0.62771  | 0.044328 |
| 157 | NRM      | 0.627264 | 0.047448 |
| 158 | IDH3G    | 0.626791 | 0.031154 |
| 159 | COQ4     | 0.626638 | 0.020365 |
| 160 | LDB1     | 0.625545 | 0.02283  |
| 161 | ELMO2    | 0.625328 | 0.004717 |
| 162 | OTUD1    | 0.624548 | 0.012115 |
| 163 | DHRS1    | 0.624017 | 0.010818 |
| 164 | NTN1     | 0.623547 | 0.047593 |
| 165 | ZNF274   | 0.623147 | 0.016884 |
| 166 | RFX5     | 0.622883 | 0.02133  |
| 167 | ASB1     | 0.620291 | 0.040079 |
| 168 | TMEM86A  | 0.62001  | 0.02999  |
| 169 | GPR182   | 0.6196   | 0.044989 |
| 170 | ENPP5    | 0.618339 | 0.049995 |
| 171 | WHAMM    | 0.617242 | 0.000333 |
| 172 | ZNF76    | 0.616499 | 0.037622 |
| 173 | ZPLD1    | 0.613642 | 0.046347 |
| 174 | ZNF438   | 0.612947 | 0.016036 |
| 175 | WDR83    | 0.612331 | 0.041599 |
| 176 | XRCC1    | 0.611572 | 0.049537 |
| 177 | DEF6     | 0.610863 | 0.039695 |

|     |             |          |          |
|-----|-------------|----------|----------|
| 178 | GPD1        | 0.609826 | 0.033788 |
| 179 | VAMP5       | 0.609449 | 0.013502 |
| 180 | SEZ6        | 0.609125 | 0.038447 |
| 181 | PTGDR2      | 0.609021 | 0.035066 |
| 182 | TAL1        | 0.608965 | 0.017741 |
| 183 | TMCC3       | 0.608875 | 0.014328 |
| 184 | ZDHHC18     | 0.607872 | 0.04935  |
| 185 | EBI3        | 0.60772  | 0.035961 |
| 186 | UBE2D4      | 0.607693 | 0.045706 |
| 187 | KLF2        | 0.606775 | 0.016488 |
| 188 | SMIM9       | 0.604355 | 0.0412   |
| 189 | FAM117A     | 0.60432  | 0.009658 |
| 190 | MINDY1      | 0.603458 | 0.038283 |
| 191 | MED15       | 0.603132 | 0.021571 |
| 192 | SNRNP70     | 0.601952 | 0.035697 |
| 193 | RABGGTA     | 0.599438 | 0.036674 |
| 194 | MAGI2       | 0.599255 | 0.006127 |
| 195 | NHSL1       | 0.599128 | 0.002647 |
| 196 | UNK         | 0.598403 | 0.042785 |
| 197 | FBRSL1      | 0.598318 | 0.043104 |
| 198 | PEX5        | 0.597637 | 0.023885 |
| 199 | PLAGL2      | 0.59762  | 0.002745 |
| 200 | TMEM53      | 0.596044 | 0.049885 |
| 201 | ZNF408      | 0.595451 | 0.03463  |
| 202 | DTX4        | 0.594748 | 0.034222 |
| 203 | F8          | 0.5934   | 0.030087 |
| 204 | KLF9        | 0.590009 | 0.018907 |
| 205 | VSIR        | 0.590007 | 0.032056 |
| 206 | SYT3        | 0.587828 | 0.037201 |
| 207 | STING1      | 0.585599 | 0.04828  |
| 208 | NAT9        | 0.58532  | 0.041771 |
| 209 | ASB9        | 0.584996 | 0.031451 |
| 210 | SQSTM1      | 0.583195 | 0.011725 |
| 211 | RALGPS1     | 0.579997 | 0.010428 |
| 212 | LMBR1L      | 0.579906 | 0.009539 |
| 213 | AKNA        | 0.576154 | 0.042204 |
| 214 | ssc-mir-326 | 0.575802 | 0.037092 |
| 215 | TENT5C      | 0.575162 | 0.039615 |
| 216 | ssc-mir-425 | 0.574603 | 0.022188 |
| 217 | TMEM145     | 0.574278 | 0.0273   |
| 218 | MPND        | 0.573483 | 0.022389 |
| 219 | NPFF        | 0.572369 | 0.024291 |
| 220 | HRC         | 0.571366 | 0.046536 |
| 221 | DEF8        | 0.571349 | 0.047735 |
| 222 | TMOD4       | 0.57005  | 0.042765 |

|     |              |          |          |
|-----|--------------|----------|----------|
| 223 | ssc-mir-7134 | 0.568926 | 0.029299 |
| 224 | ZNF202       | 0.568292 | 0.010133 |
| 225 | KCTD13       | 0.566643 | 0.049658 |
| 226 | ZNF704       | 0.565146 | 0.039844 |
| 227 | PIP5K1C      | 0.565059 | 0.045438 |
| 228 | THNSL2       | 0.564093 | 0.020868 |
| 229 | MID1         | 0.562136 | 0.017635 |
| 230 | HSPA1L       | 0.561717 | 0.002524 |
| 231 | CERS4        | 0.561261 | 0.011392 |
| 232 | ANKDD1A      | 0.561231 | 0.028517 |
| 233 | NFKBID       | 0.560944 | 0.001595 |
| 234 | KANK3        | 0.559095 | 0.047392 |
| 235 | MOCOS        | 0.557174 | 0.016812 |
| 236 | STOML1       | 0.556889 | 0.038229 |
| 237 | FKBP5        | 0.556736 | 0.027238 |
| 238 | NTN5         | 0.556192 | 0.034343 |
| 239 | HSD17B1      | 0.555956 | 0.018589 |
| 240 | ssc-mir-32   | 0.554635 | 0.031062 |
| 241 | PPARGC1B     | 0.553967 | 0.043337 |
| 242 | SAP25        | 0.552136 | 0.04984  |
| 243 | DAGLB        | 0.552067 | 0.007455 |
| 244 | NR3C2        | 0.551358 | 0.030602 |
| 245 | RASGEF1B     | 0.550873 | 0.02447  |
| 246 | FAXDC2       | 0.550792 | 0.032782 |
| 247 | NAGLU        | 0.549801 | 0.015674 |
| 248 | PLEKHA6      | 0.547792 | 0.046491 |
| 249 | LRCH4        | 0.54753  | 0.039475 |
| 250 | PAMR1        | 0.547087 | 0.025656 |
| 251 | KLHL35       | 0.54657  | 0.032759 |
| 252 | MIRLET7G     | 0.544836 | 0.01828  |
| 253 | DNAH1        | 0.543723 | 0.04856  |
| 254 | SEMA5A       | 0.543694 | 0.005687 |
| 255 | SHFL         | 0.543134 | 0.019756 |
| 256 | MIR25        | 0.542636 | 0.030543 |
| 257 | MYH7B        | 0.54101  | 0.021935 |
| 258 | NBEAL2       | 0.539588 | 0.013535 |
| 259 | TMEM134      | 0.53944  | 0.025058 |
| 260 | ALOX15B      | 0.539058 | 0.049893 |
| 261 | ARRDC2       | 0.538569 | 0.014735 |
| 262 | GABARAPL1    | 0.538528 | 0.004624 |
| 263 | MAN2C1       | 0.536982 | 0.024752 |
| 264 | PLEKHA7      | 0.535722 | 0.023133 |
| 265 | ELOVL2       | 0.53477  | 0.012178 |
| 266 | CES5A        | 0.53398  | 0.039453 |
| 267 | IZUMO4       | 0.533777 | 0.025988 |

|     |             |          |          |
|-----|-------------|----------|----------|
| 268 | PRDM11      | 0.533384 | 0.037771 |
| 269 | RGSL1       | 0.532683 | 0.029178 |
| 270 | SLC2A4      | 0.531279 | 0.044559 |
| 271 | SH3YL1      | 0.528231 | 0.01623  |
| 272 | GABBR1      | 0.525573 | 0.029611 |
| 273 | ITIH5       | 0.524394 | 0.035727 |
| 274 | PIK3R6      | 0.523159 | 0.036427 |
| 275 | GPSM3       | 0.521865 | 0.037712 |
| 276 | PTPRE       | 0.521563 | 0.002322 |
| 277 | CCDC42      | 0.52132  | 0.029773 |
| 278 | ACE         | 0.520491 | 0.033514 |
| 279 | ssc-mir-191 | 0.520096 | 0.003612 |
| 280 | FGD2        | 0.516366 | 0.041134 |
| 281 | RBM38       | 0.51588  | 0.049818 |
| 282 | MYO18B      | 0.513865 | 0.013814 |
| 283 | NEURL1      | 0.510004 | 0.04095  |
| 284 | ARHGEF4     | 0.507711 | 0.041669 |
| 285 | OSM         | 0.507411 | 0.041823 |
| 286 | LGI4        | 0.506388 | 0.039701 |
| 287 | SLC27A3     | 0.506322 | 0.041879 |
| 288 | CATSPERG    | 0.506051 | 0.017757 |
| 289 | ABAT        | 0.505519 | 0.027347 |
| 290 | ADAMTSL4    | 0.504577 | 0.007989 |
| 291 | GNAT1       | 0.502972 | 0.041715 |
| 292 | CASTOR1     | 0.502759 | 0.04     |
| 293 | TSC22D3     | 0.500782 | 0.007565 |
| 294 | KIAA2012    | 0.500549 | 0.042215 |
| 295 | HAND2       | 0.500488 | 0.049832 |
| 296 | HLA-DOB     | 0.500441 | 0.026944 |
| 297 | AMHR2       | 0.500397 | 0.025024 |
| 298 | PICK1       | 0.499788 | 0.007506 |
| 299 | RINL        | 0.498882 | 0.002431 |
| 300 | THPO        | 0.498589 | 0.047675 |
| 301 | DNAJB13     | 0.497036 | 0.023622 |
| 302 | SLC25A41    | 0.493084 | 0.01675  |
| 303 | NFKBIA      | 0.492894 | 0.017272 |
| 304 | PIWIL2      | 0.492637 | 0.02091  |
| 305 | TMEM140     | 0.492256 | 0.031167 |
| 306 | ADAM23      | 0.490416 | 0.046672 |
| 307 | MLXIP       | 0.487074 | 0.020588 |
| 308 | DUSP15      | 0.487037 | 0.01567  |
| 309 | PTX4        | 0.48662  | 0.005837 |
| 310 | FGB         | 0.48618  | 0.042796 |
| 311 | SBSN        | 0.486024 | 0.011586 |
| 312 | LENG8       | 0.483938 | 0.032762 |

|     |                |          |          |
|-----|----------------|----------|----------|
| 313 | FRS3           | 0.483792 | 0.016488 |
| 314 | GLP2R          | 0.481672 | 0.046414 |
| 315 | FRAS1          | 0.481651 | 0.027659 |
| 316 | AIF1L          | 0.480614 | 0.015212 |
| 317 | NDRG2          | 0.479175 | 0.015297 |
| 318 | MAP4K2         | 0.475648 | 0.01242  |
| 319 | MYBPC2         | 0.474633 | 0.031882 |
| 320 | FAM167A        | 0.474495 | 0.013097 |
| 321 | GRIP2          | 0.47404  | 0.041308 |
| 322 | SLC4A11        | 0.473558 | 0.009585 |
| 323 | RYR2           | 0.473109 | 0.042465 |
| 324 | TMEM178B       | 0.468872 | 0.014397 |
| 325 | DLGAP1         | 0.468511 | 0.040903 |
| 326 | ssc-mir-29b-2  | 0.467087 | 0.029199 |
| 327 | PIK3IP1        | 0.46602  | 0.004516 |
| 328 | TRAF1          | 0.463946 | 0.002529 |
| 329 | COQ8A          | 0.463869 | 0.023985 |
| 330 | TCTEX1D4       | 0.46354  | 0.049914 |
| 331 | P2RX6          | 0.462561 | 0.044825 |
| 332 | MIR26B         | 0.462109 | 0.001839 |
| 333 | GRAMD1B        | 0.46203  | 0.039477 |
| 334 | CHP2           | 0.461467 | 0.01738  |
| 335 | RDH13          | 0.460017 | 0.026569 |
| 336 | ACER2          | 0.459203 | 0.010189 |
| 337 | STUM           | 0.455167 | 0.002562 |
| 338 | KDF1           | 0.453988 | 0.037076 |
| 339 | AKAP12         | 0.452143 | 0.001227 |
| 340 | FMO1           | 0.450511 | 0.016079 |
| 341 | WDR93          | 0.449308 | 0.028904 |
| 342 | NRIP2          | 0.447954 | 0.020415 |
| 343 | RBPMS2         | 0.444859 | 0.04507  |
| 344 | MYOZ1          | 0.444839 | 0.031309 |
| 345 | ssc-mir-9855-1 | 0.443224 | 0.027968 |
| 346 | SPOCK2         | 0.442905 | 0.011917 |
| 347 | SPATA25        | 0.441974 | 0.020727 |
| 348 | PTH1R          | 0.441906 | 0.031114 |
| 349 | GPR75          | 0.440497 | 0.015274 |
| 350 | CFAP99         | 0.43676  | 0.035893 |
| 351 | FAM83H         | 0.436193 | 0.007376 |
| 352 | CBLN3          | 0.433607 | 0.003699 |
| 353 | KCNK7          | 0.433007 | 0.039651 |
| 354 | SLC39A5        | 0.427181 | 0.004672 |
| 355 | PAPLN          | 0.426704 | 0.039667 |
| 356 | UNC5C          | 0.423815 | 0.009323 |
| 357 | MISP           | 0.423541 | 0.017187 |



|     |               |          |          |
|-----|---------------|----------|----------|
| 358 | LRRC2         | 0.423441 | 0.026865 |
| 359 | RAB26         | 0.418494 | 0.034832 |
| 360 | KLHL38        | 0.417503 | 0.049782 |
| 361 | ICAM5         | 0.415967 | 0.033537 |
| 362 | MIR148A       | 0.414489 | 0.039174 |
| 363 | LINGO1        | 0.414396 | 0.024923 |
| 364 | USP2          | 0.411691 | 0.00956  |
| 365 | ACKR2         | 0.409918 | 0.009228 |
| 366 | CYP2B22       | 0.407468 | 0.03015  |
| 367 | SLC24A1       | 0.406853 | 0.046879 |
| 368 | P2RX1         | 0.405794 | 0.021243 |
| 369 | TMIGD1        | 0.405382 | 0.038578 |
| 370 | RUNDC3A       | 0.404235 | 0.049591 |
| 371 | TMEM266       | 0.40065  | 0.016457 |
| 372 | ADRA1A        | 0.399225 | 0.048297 |
| 373 | ITPKC         | 0.398172 | 0.008447 |
| 374 | ANK1          | 0.396142 | 0.041579 |
| 375 | WNK2          | 0.396037 | 0.015552 |
| 376 | OTOS          | 0.394906 | 0.034534 |
| 377 | LSMEM2        | 0.39055  | 0.008865 |
| 378 | AIFM3         | 0.390231 | 0.016448 |
| 379 | PLEKHH1       | 0.389088 | 0.033188 |
| 380 | ATP1B2        | 0.386977 | 0.000399 |
| 381 | REEP1         | 0.384178 | 0.013129 |
| 382 | HPN           | 0.382181 | 0.013473 |
| 383 | UROC1         | 0.375354 | 0.049565 |
| 384 | ZAN           | 0.374978 | 0.020128 |
| 385 | CDX1          | 0.37462  | 0.013274 |
| 386 | PER1          | 0.374021 | 0.011739 |
| 387 | TTYH1         | 0.372703 | 0.002565 |
| 388 | ADAMTS13      | 0.371539 | 0.011266 |
| 389 | ADORA3        | 0.365448 | 0.008205 |
| 390 | NEURL3        | 0.364959 | 0.024604 |
| 391 | RAB20         | 0.363196 | 0.029874 |
| 392 | SRL           | 0.361975 | 0.015213 |
| 393 | ssc-mir-365-2 | 0.358679 | 0.020025 |
| 394 | MYO7B         | 0.358431 | 0.010463 |
| 395 | A2M           | 0.357922 | 0.021582 |
| 396 | SPTBN5        | 0.352409 | 0.001526 |
| 397 | TEKT2         | 0.352319 | 0.00975  |
| 398 | KLF15         | 0.351286 | 0.020876 |
| 399 | AQP10         | 0.336978 | 0.000474 |
| 400 | MARCHF10      | 0.325523 | 0.000907 |
| 401 | SLC9A3        | 0.323383 | 0.049719 |
| 402 | CRHR2         | 0.32252  | 0.027999 |

|     |               |          |          |
|-----|---------------|----------|----------|
| 403 | ARMC12        | 0.322422 | 0.010381 |
| 404 | CDHR5         | 0.321208 | 0.040029 |
| 405 | PLA2G12B      | 0.319517 | 0.019363 |
| 406 | ssc-mir-101-2 | 0.317847 | 0.011226 |
| 407 | GPR45         | 0.314427 | 0.028867 |
| 408 | SLC5A9        | 0.313104 | 0.044227 |
| 409 | IGSF9B        | 0.310437 | 0.0399   |
| 410 | PPARGC1A      | 0.307231 | 0.003742 |
| 411 | ssc-mir-152   | 0.304657 | 0.021353 |
| 412 | TLL11         | 0.302893 | 0.03817  |
| 413 | CAMK2A        | 0.299067 | 0.045544 |
| 414 | HIPK4         | 0.298488 | 0.026552 |
| 415 | GDPD2         | 0.297877 | 0.049556 |
| 416 | MYBPC3        | 0.297188 | 0.000389 |
| 417 | VIPR2         | 0.296417 | 0.042129 |
| 418 | CRYBG2        | 0.296016 | 0.038845 |
| 419 | C11orf94      | 0.290294 | 0.011266 |
| 420 | RAP1GAP       | 0.290053 | 0.020212 |
| 421 | VWA7          | 0.284607 | 0.001871 |
| 422 | STAP2         | 0.283992 | 0.048288 |
| 423 | ATP1A4        | 0.280424 | 0.006961 |
| 424 | DPEP3         | 0.279068 | 0.010639 |
| 425 | TBX20         | 0.277852 | 0.014904 |
| 426 | SCGB3A1       | 0.276209 | 0.033114 |
| 427 | ACR           | 0.271878 | 0.049036 |
| 428 | PRRT4         | 0.271611 | 0.029544 |
| 429 | B3GNT4        | 0.270207 | 0.012982 |
| 430 | NT5DC3        | 0.266995 | 0.049166 |
| 431 | GLP1R         | 0.264695 | 0.01049  |
| 432 | ADGRF3        | 0.258138 | 0.000511 |
| 433 | CAMK2B        | 0.257742 | 0.0003   |
| 434 | LRRC43        | 0.256006 | 0.035554 |
| 435 | PLA2G4E       | 0.251999 | 0.007085 |
| 436 | ARL14EPL      | 0.250083 | 0.003261 |
| 437 | ZMYND15       | 0.245289 | 0.034268 |
| 438 | PRX           | 0.245232 | 0.04561  |
| 439 | NPHS1         | 0.243495 | 0.029287 |
| 440 | COL4A4        | 0.242987 | 0.019381 |
| 441 | HJV           | 0.234349 | 0.005378 |
| 442 | IQCA1         | 0.231872 | 0.045675 |
| 443 | TAC4          | 0.216655 | 0.039063 |
| 444 | IL29          | 0.213786 | 0.006572 |
| 445 | CELF5         | 0.206875 | 0.007731 |
| 446 | PEX5L         | 0.201277 | 0.046381 |
| 447 | WNT6          | 0.183577 | 0.008984 |

|     |              |          |          |
|-----|--------------|----------|----------|
| 448 | ARHGEF16     | 0.177339 | 0.012038 |
| 449 | WDR49        | 0.174465 | 0.022826 |
| 450 | SFRP5        | 0.174271 | 0.004018 |
| 451 | PGC          | 0.15921  | 0.014612 |
| 452 | MIR106B      | 0.155955 | 0.004283 |
| 453 | EPB42        | 0.153543 | 0.029144 |
| 454 | C3orf49      | 0.151049 | 0.024925 |
| 455 | SCT          | 0.142309 | 0.013612 |
| 456 | PTCHD4       | 0.139021 | 0.00379  |
| 457 | KIF2B        | 0.129305 | 0.005829 |
| 458 | TEX35        | 0.125136 | 0.012733 |
| 459 | ZIC2         | 0.123914 | 0.04228  |
| 460 | LRRC4B       | 0.123125 | 0.029937 |
| 461 | AATK         | 0.109259 | 0.046055 |
| 462 | SRARP        | 0.108792 | 0.019909 |
| 463 | KIF19        | 0.107862 | 0.020157 |
| 464 | ssc-mir-130b | 0.090598 | 0.010351 |
| 465 | ssc-mir-181d | 0.080046 | 0.018663 |
| 466 | COL11A2      | 0.060649 | 0.004757 |
| 467 | NRSN2        | 0.038986 | 0.003496 |
| 468 | GHRHR        | 0.029574 | 0.000481 |
